# Supplementary material
Source: PubMed Central journal article supplement (PMC4289692)
Supplement: mmc6.pdf [file mmc6.pdf]

# Fine-Scale Mapping of the 5q11.2 Breast Cancer Locus Reveals at Least Three Independent Risk Variants Regulating *MAP3K1*

Dylan M. Glubb,<sup>1,147</sup> Mel J. Maranian,<sup>2,147</sup> Kyriaki Michailidou,<sup>3,147</sup> Karen A. Pooley,<sup>2,147</sup> Kerstin B. Meyer,<sup>4</sup> Siddhartha Kar,<sup>3</sup> Saskia Carlebur,<sup>4</sup> Martin O'Reilly,<sup>4</sup> Joshua A. Betts,<sup>1,5</sup> Kristine M. Hillman,<sup>1</sup> Susanne Kaufmann,<sup>1</sup> Jonathan Beesley,<sup>1</sup> Sander Canisius,<sup>6</sup> John L. Hopper,<sup>7</sup> Melissa C. Southey,<sup>8</sup> Helen Tsimiklis,<sup>8</sup> Carmel Apicella,<sup>8</sup> Marjanka K. Schmidt,<sup>6</sup> Annegien Broeks,<sup>6</sup> Frans B. Hogervorst,<sup>6</sup> C. Ellen van der Schoot,<sup>9</sup> Kenneth Muir,<sup>10,11</sup> Artitaya Lophatananon,<sup>10</sup> Sarah Stewart-Brown,<sup>10</sup> Pornthep Siriwanarangsarn,<sup>12</sup> Peter A. Fasching,<sup>13,14</sup> Matthias Ruebner,<sup>13</sup> Arif B. Ekici,<sup>15</sup> Matthias W. Beckmann,<sup>13</sup> Julian Peto,<sup>16</sup> Isabel dos-Santos-Silva,<sup>16</sup> Olivia Fletcher,<sup>17</sup> Nichola Johnson,<sup>17</sup> Paul D.P. Pharoah,<sup>2,3</sup> Manjeet K. Bolla,<sup>3</sup> Qin Wang,<sup>3</sup> Joe Dennis,<sup>3</sup> Elinor J. Sawyer,<sup>18</sup> Ian Tomlinson,<sup>19</sup> Michael J. Kerin,<sup>20</sup> Nicola Miller,<sup>20</sup> Barbara Burwinkel,<sup>21</sup> Frederik Marme,<sup>21,22</sup> Rongxi Yang,<sup>21,23</sup> Harald Surowy,<sup>21,23</sup> Pascal Guénel,<sup>24,25</sup> Thérèse Truong,<sup>24,25</sup> Florence Menegaux,<sup>24,25</sup> Marie Sanchez,<sup>24,25</sup> Stig E. Bojesen,<sup>26,27,28</sup> Børge G. Nordestgaard,<sup>26,27,28</sup> Sune F. Nielsen,<sup>26,27</sup> Henrik Flyger,<sup>29</sup> Anna González-Neira,<sup>30</sup> Javier Benitez,<sup>31,32</sup> M. Pilar Zamora,<sup>33</sup> Jose Ignacio Arias Perez,<sup>34</sup> Hoda Anton-Culver,<sup>35</sup> Susan L. Neuhausen,<sup>36</sup> Hermann Brenner,<sup>37,38</sup> Aida Karina Dieffenbach,<sup>37,38</sup> Volker Arndt,<sup>37</sup> Christa Stegmaier,<sup>39</sup> Alfons Meindl,<sup>40</sup> Rita K. Schmutzler,<sup>41,42,43,44,146</sup> Hiltrud Brauch,<sup>45,46</sup> Yon-Dschun Ko,<sup>47</sup> Thomas Brüning,<sup>48</sup> The GENICA Network,<sup>23,45,46,47,48,49</sup> Heli Nevanlinna,<sup>50</sup> Taru A. Muranen,<sup>50</sup> Kristiina Aittomäki,<sup>51</sup> Carl Blomqvist,<sup>52</sup> Keitaro Matsuo,<sup>53</sup> Hidemi Ito,<sup>54</sup> Hiroji Iwata,<sup>55</sup> Hideo Tanaka,<sup>54</sup> Thilo Dörk,<sup>56</sup> Natalia V. Bogdanova,<sup>57</sup> Sonja Helbig,<sup>56</sup> Annika Lindblom,<sup>58</sup> Sara Margolin,<sup>59</sup> Arto Mannermaa,<sup>60,61,62</sup> Vesa Kataja,<sup>60,61,62,63</sup> Veli-Matti Kosma,<sup>60,61,62</sup> Jaana M. Hartikainen,<sup>60,61,62</sup> kConFab Investigators,<sup>64</sup> Anna H. Wu,<sup>65</sup> Chiu-chen Tseng,<sup>65</sup> David Van Den Berg,<sup>65</sup> Daniel O. Stram,<sup>65</sup> Diether Lambrechts,<sup>66,67</sup> Hui Zhao,<sup>66,67</sup> Caroline Weltens,<sup>68</sup> Erik van Limbergen,<sup>68</sup> Jenny Chang-Claude,<sup>69</sup> Dieter Flesch-Janys,<sup>70</sup> Anja Rudolph,<sup>69</sup> Petra Seibold,<sup>69</sup> Paolo Radice,<sup>71</sup> Paolo Peterlongo,<sup>72</sup> Monica Barile,<sup>73</sup> Fabio Capra,<sup>72,74</sup> Fergus J. Couch,<sup>75</sup> Janet E. Olson,<sup>76</sup> Emily Hallberg,<sup>76</sup> Celine Vachon,<sup>76</sup> Graham G. Giles,<sup>6,77</sup> Roger L. Milne,<sup>6,77</sup> Catriona McLean,<sup>78</sup> Christopher A. Haiman,<sup>65</sup> Brian E. Henderson,<sup>65</sup> Fredrick Schumacher,<sup>65</sup> Loic Le Marchand,<sup>79</sup> Jacques Simard,<sup>80</sup> Mark S. Goldberg,<sup>81,82</sup> France Labrèche,<sup>83</sup> Martine Dumont,<sup>80</sup> Soo Hwang Teo,<sup>84,85</sup> Cheng Har Yip,<sup>85</sup> Mee-Hoong See,<sup>85</sup> Belinda Cornes,<sup>86</sup> Ching-Yu Cheng,<sup>86</sup> M. Kamran Ikram,<sup>86</sup> Vessela Kristensen,<sup>87,88,89</sup> Norwegian Breast Cancer Study,<sup>87,88,90,91,92,93,94,95,96,97,98,99,100,101</sup> Wei Zheng,<sup>102</sup> Sandra L. Halverson,<sup>102</sup> Martha Shrubsole,<sup>102</sup> Jirong Long,<sup>102</sup> Robert Winqvist,<sup>103</sup> Katri Pykäs,<sup>103</sup> Arja Jukkola-Vuorinen,<sup>104</sup> Saira Kauppila,<sup>105</sup> Irene L. Andrulis,<sup>106,107</sup> Julia A. Knight,<sup>108,109</sup> Gord Glendon,<sup>110</sup> Sandrine Tchatchou,<sup>110</sup> Peter Devilee,<sup>111</sup> Robert A.E.M. Tollenaar,<sup>111</sup> Caroline Seynaeve,<sup>112</sup> Christi J. Van Asperen,<sup>113</sup> Montserrat García-Closas,<sup>17,114</sup> Jonine Figueroa,<sup>115</sup> Stephen J. Chanock,<sup>115</sup> Jolanta Lissowska,<sup>116</sup> Kamila Czene,<sup>117</sup> Daniel Klevebring,<sup>117</sup> Hatef Darabi,<sup>117</sup> Mikael Eriksson,<sup>117</sup> Maartje J. Hooning,<sup>118</sup> Antoinette Hollestelle,<sup>118</sup> John W.M. Martens,<sup>118</sup> J. Margriet Collée,<sup>119</sup> Per Hall,<sup>117</sup> Jingmei Li,<sup>120</sup> Keith Humphreys,<sup>117</sup> Xiao-Ou Shu,<sup>102</sup> Wei Lu,<sup>121</sup> Yu-Tang Gao,<sup>122</sup> Hui Cai,<sup>102</sup> Angela Cox,<sup>123</sup> Simon S. Cross,<sup>124</sup> Malcolm W.R. Reed,<sup>123</sup> William Blot,<sup>102,125</sup> Lisa B. Signorello,<sup>102,125</sup> Qiuyin Cai,<sup>102</sup> Mitul Shah,<sup>2</sup> Maya Ghousaini,<sup>2</sup> Daehee Kang,<sup>126,127,128</sup> Ji-Yeob Choi,<sup>127,128</sup> Sue K. Park,<sup>126,127,128</sup> Dong-Young Noh,<sup>129</sup> Mikael Hartman,<sup>130,131</sup> Hui Miao,<sup>130</sup> Wei Yen Lim,<sup>130</sup> Anthony Tang,<sup>132</sup> Ute Hamann,<sup>23</sup> Diana Torres,<sup>23,133</sup> Anna Jakubowska,<sup>134</sup> Jan Lubinski,<sup>134</sup> Katarzyna Jaworska,<sup>134</sup> Katarzyna Durda,<sup>134</sup> Suleeporn Sangrajang,<sup>135</sup> Valerie Gaborieau,<sup>136</sup> Paul Brennan,<sup>136</sup> James McKay,<sup>136</sup> Curtis Olsword,<sup>76</sup> Susan Slager,<sup>76</sup> Amanda E. Toland,<sup>137</sup> Drakoulis Yannoukakos,<sup>138</sup> Chen-Yang Shen,<sup>139,140,141</sup> Pei-Ei Wu,<sup>139,141</sup> Jyh-Cherng Yu,<sup>142</sup> Ming-Feng Hou,<sup>143</sup> Anthony Swerdlow,<sup>114,144</sup> Alan Ashworth,<sup>17</sup> Nick Orr,<sup>17</sup> Michael Jones,<sup>114</sup> Guillermo Pita,<sup>30</sup> M. Rosario Alonso,<sup>30</sup> Nuria Álvarez,<sup>30</sup> Daniel Herrero,<sup>30</sup> Daniel C. Tessier,<sup>145</sup> Daniel Vincent,<sup>145</sup> Francois Bacot,<sup>145</sup> Craig Luccarini,<sup>2</sup> Caroline Baynes,<sup>2</sup> Shahana Ahmed,<sup>2</sup> Catherine S. Healey,<sup>2</sup> Melissa A. Brown,<sup>5</sup> Bruce A.J. Ponder,<sup>4</sup> Georgia Chenevix-Trench,<sup>1</sup> Deborah J. Thompson,<sup>3</sup> Stacey L. Edwards,<sup>1,5</sup> Douglas F. Easton,<sup>2,3</sup> Alison M. Dunning,<sup>2,148,\*</sup> and Juliet D. French<sup>1,5,148,\*</sup>

<sup>1</sup>Cancer Division, QIMR Berghofer Medical Research Institute, Brisbane, QLD 4029, Australia; <sup>2</sup>Centre for Cancer Genetic Epidemiology, Department of Oncology, University of Cambridge, Cambridge CB1 8RN, UK; <sup>3</sup>Centre for Cancer Genetic Epidemiology, Department of Public Health and Primary Care, University of Cambridge, Cambridge CB1 8RN, UK; <sup>4</sup>Cancer Research UK Cambridge Institute and Department of Oncology, University of Cambridge, Li Ka Shing Centre, Robinson Way, Cambridge CB2 0RE, UK; <sup>5</sup>School of Chemistry and Molecular Biosciences, University of Queensland, Brisbane, QLD 4072, Australia; <sup>6</sup>Netherlands Cancer Institute, Antoni van Leeuwenhoek Hospital, 1066 CX Amsterdam, the Netherlands; <sup>7</sup>Centre for Epidemiology and Biostatistics, Melbourne School of Population and Global Health, University of Melbourne, Melbourne, VIC 3010, Australia; <sup>8</sup>Department of Pathology, University of Melbourne, Melbourne, VIC 3010, Australia; <sup>9</sup>Sanquin Research, 1066 CX Amsterdam, the Netherlands; <sup>10</sup>Division of Health Sciences, Warwick Medical School, Warwick University, Coventry CV4 7AL, UK; <sup>11</sup>Institute of Population Health, University of Manchester, Manchester M13 9PL, UK; <sup>12</sup>Ministry of Public Health, Nonthaburi 11000, Thailand; <sup>13</sup>University Breast Center Franconia, Department of Gynecology and Obstetrics, University Hospital Erlangen, Friedrich-Alexander University of Erlangen-Nuremberg, Comprehensive Cancer Center Erlangen-EMN, 91054 Erlangen, Germany; <sup>14</sup>Division of Hematology and Oncology, Department of Medicine, David Geffen School of Medicine, University of California, Los Angeles, Los Angeles, CA 90095, USA; <sup>15</sup>Institute of Human Genetics, University Hospital Erlangen, Friedrich-Alexander University of Erlangen-Nuremberg, Comprehensive Cancer Center Erlangen-EMN, 91054 Erlangen, Germany; <sup>16</sup>Department of Non-Communicable Disease Epidemiology, London School of Hygiene and Tropical Medicine, London WC1E 7HT, UK; <sup>17</sup>Breakthrough Breast Cancer Research Centre, Institute of Cancer Research, London SW3 6JB, UK; <sup>18</sup>Research Oncology, Division of Cancer Studies, King's College London, Guy's Hospital, London SE1 9RT, UK; <sup>19</sup>Wellcome Trust Centre for Human Genetics and Oxford Biomedical Research Centre, University of Oxford OX3 7BN, UK; <sup>20</sup>Clinical Science Institute, University Hospital Galway, Galway, Ireland; <sup>21</sup>Department of Obstetrics and Gynecology, University of Heidelberg, 69115 Heidelberg, Germany; <sup>22</sup>National Center for Tumor Diseases, University of Heidelberg, 69120 Heidelberg, Germany; <sup>23</sup>Molecular Genetics of Breast Cancer, German Cancer Research Center, 69120 Heidelberg, Germany; <sup>24</sup>Institut National de la Santé et de la Recherche Médicale U1018, Environmental Epidemiology of Cancers, Centre de Recherche en Epidémiologie et Santé des Populations, 94807 Villejuif, France; <sup>25</sup>UMRS 1018, University Paris-Sud, 94807 Villejuif, France; <sup>26</sup>Copenhagen General Population Study, Herlev Hospital, Copenhagen University Hospital, 2730 Herlev, Denmark; <sup>27</sup>Department of Clinical Biochemistry, Herlev Hospital, Copenhagen University Hospital, 2730 Herlev, Denmark; <sup>28</sup>Faculty of Health and Medical Sciences, University of Copenhagen, 2200 Copenhagen, Denmark; <sup>29</sup>Department of Breast Surgery, Herlev Hospital, Copenhagen University Hospital, 2730 Herlev, Denmark; <sup>30</sup>Centro Nacional de Genotipado Human Genotyping Unit, Human Cancer Genetics Program, Spanish National Cancer Research Centre, 28029 Madrid, Spain; <sup>31</sup>Centro de Investigación en Red de Enfermedades Raras, 46010 Valencia, Spain; <sup>32</sup>Human Genetics Group, Spanish National Cancer Centre and Biomedical Network on Rare Diseases, 28029 Madrid, Spain; <sup>33</sup>Servicio de Oncología Médica, Hospital Universitario La Paz, 28029 Madrid, Spain; <sup>34</sup>Servicio de Cirugía General y Especialidades, Hospital Monte Naranco, 33012 Oviedo, Spain; <sup>35</sup>Department of Epidemiology, University of California, Irvine, Irvine, CA 92697, USA; <sup>36</sup>Beckman Research Institute of City of Hope, Duarte, CA 91010, USA; <sup>37</sup>Division of Clinical Epidemiology and Aging Research, German Cancer Research Center, 69120 Heidelberg, Germany; <sup>38</sup>German Cancer Consortium, 69120 Heidelberg, Germany; <sup>39</sup>Saarland Cancer Registry, 66024 Saarbrücken, Germany; <sup>40</sup>Division of Gynaecology and Obstetrics, Technische Universität München, 81675 Munich, Germany; <sup>41</sup>Division of Molecular Gyneco-Oncology, Department of Gynaecology and Obstetrics, University Hospital of Cologne, 50931 Cologne, Germany; <sup>42</sup>Centre of Familial Breast and Ovarian Cancer, Department of Gynaecology and Obstetrics and Centre for Integrated Oncology, Center for Molecular Medicine Cologne, University Hospital of Cologne, 50937 Cologne, Germany; <sup>43</sup>Center for Molecular Medicine Cologne, University of Cologne, 50923 Cologne, Germany; <sup>44</sup>Center for Integrated Oncology, Medical Faculty, University Hospital of Cologne, 50937 Cologne, Germany; <sup>45</sup>University of Tübingen, 72074 Tübingen, Germany; <sup>46</sup>Dr. Margarete Fischer-Bosch Institute for Clinical Pharmacology, 70376 Stuttgart, Germany; <sup>47</sup>Department of Internal Medicine, Evangelische Kliniken Bonn gGmbH, Johanniter Krankenhaus, 53113 Bonn, Germany; <sup>48</sup>Institute for Prevention and Occupational Medicine of the German Social Accident Insurance, Institute of the Ruhr University Bochum, 44789 Bochum, Germany; <sup>49</sup>Institute of Occupational Medicine and Maritime Medicine, University Medical Center Hamburg-Eppendorf, 20246 Hamburg, Germany; <sup>50</sup>Department of Obstetrics and Gynecology, University of Helsinki and Helsinki University Central Hospital, Hospital District of Helsinki and Uusimaa, 00029 Helsinki, Finland; <sup>51</sup>Department of Clinical Genetics, Helsinki University Central Hospital, 00029 Helsinki, Finland; <sup>52</sup>Department of Oncology, University of Helsinki and Helsinki University Central Hospital, 00029 Helsinki, Finland; <sup>53</sup>Department of Preventive Medicine, Faculty of Medical Sciences, Kyushu University, Fukuoka 812-8582, Japan; <sup>54</sup>Division of Epidemiology and Prevention, Aichi Cancer Center Research Institute, Nagoya 464-8681, Japan; <sup>55</sup>Department of Breast Oncology, Aichi Cancer Center Hospital, Nagoya 464-8681, Japan; <sup>56</sup>Gynaecology Research Unit, Hannover Medical School, 30625 Hannover, Germany; <sup>57</sup>Department of Radiation Oncology, Hannover Medical School, 30625 Hannover, Germany; <sup>58</sup>Department of Molecular Medicine and Surgery, Karolinska Institutet, 171 77 Stockholm, Sweden; <sup>59</sup>Department of Oncology-Pathology, Karolinska Institutet, 171 77 Stockholm, Sweden; <sup>60</sup>Cancer Center of Eastern Finland, University of Eastern Finland, 70211 Kuopio, Finland; <sup>61</sup>Imaging Center, Department of Clinical Pathology, Kuopio University Hospital, 70211 Kuopio, Finland; <sup>62</sup>School of Medicine, Institute of Clinical Medicine, Pathology, and Forensic Medicine, University of Eastern Finland, 70211 Kuopio, Finland; <sup>63</sup>Cancer Center, Kuopio University Hospital, 70211 Kuopio, Finland; <sup>64</sup>Peter MacCallum Cancer Institute, East Melbourne, VIC 3002, Australia; <sup>65</sup>Department of Preventive Medicine, Keck School of Medicine, University of Southern California Norris Comprehensive Cancer Center, Los Angeles, CA 90089, USA; <sup>66</sup>Laboratory for Translational Genetics, Department of Oncology, University of Leuven, 3000 Leuven, Belgium; <sup>67</sup>Vesalius Research Center, VIB, 3000 Leuven, Belgium; <sup>68</sup>University Hospital Gashuisberg, 3000 Leuven, Belgium; <sup>69</sup>Division of Cancer Epidemiology, German Cancer Research Center, 69120 Heidelberg, Germany; <sup>70</sup>Department of Cancer Epidemiology/Clinical Cancer Registry and Institute for Medical Biometrics and Epidemiology, University Clinic Hamburg-Eppendorf, 20246 Hamburg, Germany; <sup>71</sup>Unit of Molecular Bases of Genetic Risk and Genetic Testing, Department of Preventive and Predictive Medicine, Istituto Nazionale Tumori, Fondazione Istituto Neurologico Carlo Besta, 20133 Milan, Italy; <sup>72</sup>Istituto Fondazione Italiana per la Ricerca sul Cancro di Oncologia Molecolare, 20139 Milan, Italy; <sup>73</sup>Division of Cancer Prevention and Genetics, Istituto Europeo di Oncologia, 20141 Milan, Italy; <sup>74</sup>Cogentech Cancer Genetic Test Laboratory, 20139 Milan, Italy; <sup>75</sup>Department of Laboratory Medicine and Pathology, Mayo Clinic, Rochester, MN 55905, USA; <sup>76</sup>Department of Health Sciences Research, Mayo Clinic, Rochester, MN 55905, USA; <sup>77</sup>Cancer Epidemiology Centre, Cancer Council Victoria, Melbourne, VIC 3053, Australia; <sup>78</sup>Anatomical Pathology, The Alfred, Melbourne, VIC 3004, Australia; <sup>79</sup>University of Hawaii Cancer Centre Honolulu, HI 96813, USA; <sup>80</sup>Centre Hospitalier Universitaire de Québec Research Center and Laval University, Québec City, QC G1V 4G2, Canada; <sup>81</sup>Division of Clinical Epidemiology, McGill University Health Centre, Royal Victoria Hospital, Montreal, QC H3A 1A1, Canada; <sup>82</sup>Department of Medicine, McGill University, Montreal, QC H3A 1A1, Canada; <sup>83</sup>Département de Médecine Sociale et Préventive, Département de Santé Environnementale et Santé au Travail, Université de Montréal, Montreal, QC H3A 3C2, Canada; <sup>84</sup>Cancer Research Initiatives Foundation, Sime Darby Medical Centre, 47500 Subang Jaya, Malaysia; <sup>85</sup>Breast Cancer Research Unit, University Malaya Cancer Research Institute, University Malaya Medical Centre, 50603 Kuala Lumpur, Malaysia; <sup>86</sup>Singapore Eye Research Institute, National University of Singapore, Singapore 168751, Singapore; <sup>87</sup>Institute of Clinical Medicine, University of Oslo, 0450 Oslo, Norway; <sup>88</sup>Department of Genetics, Institute for Cancer Research, Oslo University Hospital, Radiumhospitalet, 0310 Oslo, Norway; <sup>89</sup>Department of Clinical Molecular Biology, University of Oslo, 0450 Oslo, Norway; <sup>90</sup>Section of Oncology, Institute of Medicine, University of Bergen, 5020 Bergen, Norway; <sup>91</sup>Norwegian Centre for Integrated Care and Telemedicine, University Hospital of North Norway, 9038 Tromsø, Norway; <sup>92</sup>National Resource Centre for Long-Term Studies after Cancer, Rikshospitalet-Radiumhospitalet Cancer Clinic, Montebello, 0310 Oslo, Norway; <sup>93</sup>Division of Cancer Medicine and Radiotherapy, Oslo University Hospital, Radiumhospitalet, 0310 Oslo, Norway; <sup>94</sup>Department of Surgery, Akershus University Hospital, 1478 Lørenskog, Norway; <sup>95</sup>Department of Radiology, Oslo University Hospital, Radiumhospitalet, 0310 Oslo, Norway; <sup>96</sup>Department of Pathology, Akershus University Hospital, 1478 Lørenskog, Norway; <sup>97</sup>Department of Oncology, Oslo University Hospital, Radiumhospitalet, 0310 Oslo, Norway; <sup>98</sup>Department of Oncology, Haukeland University Hospital, Bergen, 5021 Bergen, Norway; <sup>99</sup>Department of Community Medicine, Faculty of Health Sciences, University of Tromsø – The Arctic University of Norway, 9019 Tromsø, Norway; <sup>100</sup>Department of Clinical Molecular Biology, Institute of Clinical Medicine, Akershus University Hospital, University of Oslo, 1478 Lørenskog, Norway; <sup>101</sup>Department of Breast and Endocrine Surgery, Institute for Clinical Medicine, Ullevaal University Hospital, Oslo University Hospital, 0450 Oslo, Norway; <sup>102</sup>Division of Epidemiology, Department of Medicine, Vanderbilt Epidemiology Center and Vanderbilt-Ingram Cancer Center, Vanderbilt University School of Medicine, Nashville,

Genome-wide association studies (GWASs) have revealed SNP rs889312 on 5q11.2 to be associated with breast cancer risk in women of European ancestry. In an attempt to identify the biologically relevant variants, we analyzed 909 genetic variants across 5q11.2 in 103,991 breast cancer individuals and control individuals from 52 studies in the Breast Cancer Association Consortium. Multiple logistic regression analyses identified three independent risk signals: the strongest associations were with 15 correlated variants (iCHAV1), where the minor allele of the best candidate, rs62355902, associated with significantly increased risks of both estrogen-receptor-positive (ER<sup>+</sup>: odds ratio [OR] = 1.24, 95% confidence interval [CI] = 1.21–1.27, p<sub>trend</sub> = 5.7 × 10<sup>-44</sup>) and estrogen-receptor-negative (ER<sup>-</sup>: OR = 1.10, 95% CI = 1.05–1.15, p<sub>trend</sub> = 3.0 × 10<sup>-4</sup>) tumors. After adjustment for rs62355902, we found evidence of association of a further 173 variants (iCHAV2) containing three subsets with a range of effects (the strongest was rs113317823 [p<sub>cond</sub> = 1.61 × 10<sup>-5</sup>]) and five variants composing iCHAV3 (lead rs11949391; ER<sup>+</sup>: OR = 0.90, 95% CI = 0.87–0.93, p<sub>cond</sub> = 1.4 × 10<sup>-4</sup>). Twenty-six percent of the prioritized candidate variants coincided with four putative regulatory elements that interact with the *MAP3K1* promoter through chromatin looping and affect *MAP3K1* promoter activity. Functional analysis indicated that the cancer risk alleles of four candidates (rs74345699 and rs62355900 [iCHAV1], rs16886397 [iCHAV2a], and rs17432750 [iCHAV3]) increased *MAP3K1* transcriptional activity. Chromatin immunoprecipitation analysis revealed diminished GATA3 binding to the minor (cancer-protective) allele of rs17432750, indicating a mechanism for its action. We propose that the cancer risk alleles act to increase *MAP3K1* expression in vivo and might promote breast cancer cell survival.

## Introduction

One of the first genome-wide association studies (GWASs) for breast cancer (MIM 114480) susceptibility identified a 5q11.2 SNP (rs889312) associated with risk of breast cancer in women of European ancestry.<sup>1</sup> In the most recent analyses by the Breast Cancer Association Consortium (BCAC), the minor allele of rs889312 was associated with a per-allele odds ratio (OR) = 1.12 (95% confidence interval [CI] = 1.10–1.15; p<sub>trend</sub> = 1.8 × 10<sup>-26</sup>).<sup>2</sup> The association was stronger for estrogen-receptor-positive (ER<sup>+</sup>) disease (OR = 1.14, 95% CI = 1.11–1.17, p = 1.1 × 10<sup>-26</sup> in the most recent BCAC analysis) but was also seen for estrogen-

receptor-negative (ER<sup>-</sup>) disease (OR = 1.06, 95% CI = 1.03–1.10, p = 0.0024) and triple negative disease (OR = 1.11, 95% CI = 1.02–1.20, p = 0.016).<sup>3</sup> SNP rs889312 was also reported to be associated with an increased breast cancer risk in carriers of *BRCA2* (MIM 600185) mutations.<sup>4</sup>

The GWAS SNP rs889312 lies approximately 80 kb centromeric to *MAP3K1* (MIM 600982), the gene encoding mitogen-activated protein kinase kinase 1, also known as MEK kinase 1 (MEKK1), a stress-induced serine/threonine kinase with apparent dual functions: MEKK1 induces cell proliferation through a RAS-RAF-MEK-ERK signaling pathway,<sup>5</sup> but upon caspase cleavage, it generates a fragment with a proapoptotic function.<sup>6,7</sup> Furthermore,

TN 37203, USA; <sup>103</sup>Laboratory of Cancer Genetics and Tumor Biology, Department of Clinical Chemistry and Biocenter Oulu, University of Oulu, NordLab Oulu, Oulu University Hospital, 90210 Oulu, Finland; <sup>104</sup>Department of Oncology, Oulu University Hospital, University of Oulu, 90014 Oulu, Finland; <sup>105</sup>Department of Pathology, Oulu University Hospital, University of Oulu, 90014 Oulu, Finland; <sup>106</sup>Lunenfeld-Tanenbaum Research Institute of Mount Sinai Hospital, Toronto, ON M5G 1X5, Canada; <sup>107</sup>Department of Molecular Genetics, University of Toronto, Toronto, ON M5G 1X5, Canada; <sup>108</sup>Division of Epidemiology, Dalla Lana School of Public Health, University of Toronto, Toronto, ON M5T 3M7, Canada; <sup>109</sup>Prosserman Centre for Health Research, Lunenfeld-Tanenbaum Research Institute of Mount Sinai Hospital, Toronto, ON M5G 1X5, Canada; <sup>110</sup>Ontario Cancer Genetics Network, Lunenfeld-Tanenbaum Research Institute of Mount Sinai Hospital, Toronto, ON M5G 1X5, Canada; <sup>111</sup>Departments of Human Genetics and Pathology, Leiden University Medical Center, 2300 RC Leiden, the Netherlands; <sup>112</sup>Family Cancer Clinic, Netherlands Cancer Institute, 1066 CX Amsterdam, the Netherlands; <sup>113</sup>Department of Clinical Genetics, Leiden University Medical Center, 2300 RC Leiden, the Netherlands; <sup>114</sup>Division of Genetics and Epidemiology, Institute of Cancer Research, Sutton SM2 5NG, UK; <sup>115</sup>Division of Cancer Epidemiology and Genetics, National Cancer Institute, Rockville, MD 20892, USA; <sup>116</sup>Department of Cancer Epidemiology and Prevention, Maria Skłodowska-Curie Memorial Cancer Center and Institute of Oncology, 02-781 Warsaw, Poland; <sup>117</sup>Department of Medical Epidemiology and Biostatistics, Karolinska Institutet, 171 77 Stockholm, Sweden; <sup>118</sup>Department of Medical Oncology, Erasmus University Medical Center Cancer Institute, 3075 EA Rotterdam, the Netherlands; <sup>119</sup>Department of Clinical Genetics, Erasmus University Medical Center, 3008 AE Rotterdam, the Netherlands; <sup>120</sup>Human Genetics Division, Genome Institute of Singapore, Singapore 138672, Singapore; <sup>121</sup>Shanghai Center for Disease Control and Prevention, Changning, Shanghai 200336, China; <sup>122</sup>Department of Epidemiology, Shanghai Cancer Institute, Shanghai 200032, China; <sup>123</sup>Sheffield Cancer Research Centre, Department of Oncology, University of Sheffield, Sheffield S10 2RX, UK; <sup>124</sup>Academic Unit of Pathology, Department of Neuroscience, University of Sheffield, Sheffield S10 2RX, UK; <sup>125</sup>International Epidemiology Institute, Rockville, MD 20850, USA; <sup>126</sup>Department of Preventive Medicine, Seoul National University College of Medicine and Cancer Research Institute, Seoul National University, Seoul 110-799, Korea; <sup>127</sup>Department of Biomedical Sciences, Seoul National University Graduate School, Seoul 151-742, Korea; <sup>128</sup>Cancer Research Institute, Seoul National University College of Medicine, Seoul 110-799, Korea; <sup>129</sup>Department of Surgery, Seoul National University, Bundang Hospital, Seongnam 110-744, Korea; <sup>130</sup>Saw Swee Hock School of Public Health, National University of Singapore and National University Health System, Singapore 117597, Singapore; <sup>131</sup>Department of Surgery, Yong Loo Lin School of Medicine, National University of Singapore and National University Health System, Singapore 119228, Singapore; <sup>132</sup>Division of General Surgery, National University Health System, Singapore 119228, Singapore; <sup>133</sup>Institute of Human Genetics, Pontificia Universidad Javeriana, Bogotá 11001000, Colombia; <sup>134</sup>Department of Genetics and Pathology, Pomeranian Medical University, 70-115 Szczecin, Poland; <sup>135</sup>National Cancer Institute, Bangkok 10400, Thailand; <sup>136</sup>International Agency for Research on Cancer, 69372 Lyon, France; <sup>137</sup>Department of Molecular Virology, Immunology, and Medical Genetics, Ohio State University, Columbus, OH 43210, USA; <sup>138</sup>Molecular Diagnostics Laboratory, Institute of Radioisotopes and Radiodiagnostic Products, National Centre for Scientific Research “Demokritos,” Aghia Paraskevi Attikis, Athens 15310, Greece; <sup>139</sup>Institute of Biomedical Sciences, Academia Sinica, Taipei 115, Taiwan; <sup>140</sup>School of Public Health, China Medical University, Taichung 40402, Taiwan; <sup>141</sup>Taiwan Biobank, Institute of Biomedical Sciences, Academia Sinica, Taipei 115, Taiwan; <sup>142</sup>Department of Surgery, Tri-Service General Hospital, Taipei 114, Taiwan; <sup>143</sup>Cancer Center and Department of Surgery, Kaohsiung Medical University, Chung-Ho Memorial Hospital, Kaohsiung 807, Taiwan; <sup>144</sup>Division of Breast Cancer Research, Institute of Cancer Research, Sutton SM2 5NG, UK; <sup>145</sup>McGill University and Génome Québec Innovation Centre, Montreal, QC H3A 0G1, Canada

<sup>146</sup>On behalf of the German Consortium of Hereditary Breast and Ovarian Cancer

<sup>147</sup>These authors contributed equally to this work

<sup>148</sup>These authors contributed equally to this work

\*Correspondence: [amd24@medschl.cam.ac.uk](mailto:amd24@medschl.cam.ac.uk) (A.M.D.), [juliet.french@qimrberghofer.edu.au](mailto:juliet.french@qimrberghofer.edu.au) (J.D.F.)

<http://dx.doi.org/10.1016/j.ajhg.2014.11.009>. ©2015 by The American Society of Human Genetics. All rights reserved.

MEKK1 regulates transcription of key cancer-related genes, such as *MYC*<sup>8</sup> (MIM 190080), *TP53*<sup>9</sup> (MIM 191170), and *JUN*<sup>10</sup> (MIM 165160), through its signal-transduction pathway. There is already evidence of a role for *MAP3K1* in breast cancer pathogenesis: *MAP3K1* driver mutations have been observed in luminal A and B type breast tumors,<sup>11</sup> and *MAP3K1* expression has been associated with specific breast tumor subtypes.<sup>12</sup>

In this study, we performed genetic epidemiological analyses on all common variants at 5q11.2, together with *in silico* and *in vitro* analyses of candidate causal variants, and identified strong candidates that we propose are functionally related to breast cancer risk. Specifically, we provide evidence that these associations are mediated through *MAP3K1*.

## Material and Methods

### SNP Selection and Genotyping

Using the March 2010 release of the 1000 Genomes Project,<sup>13</sup> we searched a 305 kb interval on 5q11.2 (GRCh37 positions 55,983,657–56,288,810) and identified all SNPs with a minor allele frequency (MAF) > 0.02 in Europeans. SNPs with an Illumina designability score > 0.8 (and  $r^2 > 0.1$  with rs889312), together with a tagging set ( $r^2 > 0.9$ ) for all other known SNPs in the interval, were selected for inclusion on the iCOGS custom array.<sup>2</sup> A total of 352 SNPs, of which 300 passed postgenotyping quality-control criteria, were selected.<sup>2</sup> For improvement of SNP coverage across the locus, 16 further SNPs selected from the October 2010 release of the 1000 Genomes Project were genotyped in a subset of two BCAC studies (SEARCH and the combined Copenhagen studies CPGS [Copenhagen General Population Study] and CCHS [Copenhagen City Heart Study]) by using a Fluidigm array according to the manufacturer's instructions. These two data sets, as well as IMPUTE2 and the January 2012 release of the 1000 Genomes Project as references,<sup>14</sup> were used for imputing all genotypes of other common variants in this interval. All participants provided written informed consent, and all BCAC studies had local human ethical approvals.<sup>2</sup> Study characteristics and iCOGS methodology have been previously reported.<sup>2</sup>

### Statistical Analyses

Associations with breast cancer risk in BCAC were evaluated by a comparison of SNP genotype frequencies in case and control individuals by unconditional logistic regression. Analyses were adjusted by study and seven principal components.<sup>2</sup> The primary analysis fit each SNP as an allelic dose and tested for association with a 1-degree-of-freedom trend test ( $p_{\text{trend}}$ ) with associated OR and 95% CI. To identify independent risk signals, we performed stepwise conditional analysis in R with the function "step," which included any variant with  $p$  value <  $10^{-4}$  in the single-SNP analysis to calculate the most parsimonious model with a penalty value of  $k = 10$ . The null model included study and principal components. Haplotype analysis was performed in R with the package "haplo.stats," and the analyses were adjusted for study and principal components.

### Cell Lines

The normal breast epithelial cell line Bre-80 was cultured as described previously.<sup>15</sup> The breast cancer cell lines MCF7, T-47D,

and MDA-MB231 were cultured in RPMI 1640 medium supplemented with 10% fetal calf serum, antibiotics, sodium pyruvate, and in the case of MCF7 and T-47D cells, 10  $\mu\text{g}/\text{ml}$  insulin.

### Chromosome Conformation Capture

Chromosome conformation capture (3C) libraries were generated with EcoRI from the cell lines above as described previously.<sup>16</sup> 3C interactions were quantitated by quantitative PCR (qPCR) with primers designed within the EcoRI restriction fragments spanning the 5q11.2 risk locus (Table S1, available online). qPCR was performed as described previously<sup>17</sup> with at least two independent 3C libraries from each cell line; each experiment was quantified in duplicate. We used two bacterial artificial clones (RP11-378G4 and RP11-1146C6) covering the 5q11.2 region to create an artificial library of ligation products in order to normalize for PCR efficiency. As an internal control, interaction frequencies were normalized to that of the EcoRI fragment immediately upstream of the promoter fragment.

### Plasmid Construction

A *MAP3K1*-promoter-driven luciferase reporter construct was generated by the insertion of a 1,928 bp fragment containing the *MAP3K1* promoter and the transcription start site (chr5: 56,109,070–56,110,997, GRCh37) into the MluI and HindIII sites of pGL3-Basic. To assist cloning, AgeI and SbfI sites were inserted into the BamHI and Sall sites downstream of the luciferase gene. A 1,575 bp putative regulatory element (PRE)-A fragment, a 1,765 bp PRE-B2 fragment, a 2,357 bp PRE-B3 fragment, a 2,203 bp PRE-C fragment, and a 1,519 bp PRE-D fragment were generated by PCR using primers designed with AgeI and SbfI sites and cloned into the modified pGL3-*MAP3K1* promoter construct. PRE-B was too large (~7 kb) to be cloned in its entirety, so three subregions termed PRE-B1, PRE-B2, and PRE-B3 were cloned separately. The minor alleles of individual SNPs were introduced into promoter and PRE sequences, containing the major alleles of any other causal candidate variants, by overlap extension PCR. Sequencing of all constructs confirmed variant incorporation (AGRE, Brisbane). PCR primers are listed in Table S2. For the PRE-B1 construct, a 2,129 bp region spanning chr5: 56,028,968–56,031,097 (GRCh37) was synthesized with AgeI and SbfI sites incorporated at the 5' and 3' ends (GenScript, Piscataway) to assist cloning into the *MAP3K1* promoter construct. The cloned regions are highlighted in Figure 2B.

### Reporter Assays and Estrogen Induction

Bre-80 and MCF7 cells were transfected with equimolar amounts of luciferase reporter plasmids and 50 ng of pRLTK transfection control plasmid with Lipofectamine 2000. The total amount of transfected DNA was kept constant at 600 ng for each construct by the addition of pUC19 as a carrier plasmid. Luciferase activity was measured 24 hr posttransfection by the Dual-Glo Luciferase Assay System. Normalizing firefly luciferase activity to *Renilla* luciferase corrected for differences in transfection efficiency or cell-lysate preparation. For the assays under basal conditions, the activity of each construct was calculated in relation to the activity (defined as 1) of the construct containing the *MAP3K1* promoter alone.

For estrogen-induction assays, we treated cells as described.<sup>18</sup> In brief, 24 hr after plating MCF7 cells into wells, we replaced medium with that containing 10 nM fulvestrant for 48 hr to inhibit estrogen-induced gene expression and thereby create a baseline

of expression for reporter assays. Cells were then incubated with fresh medium containing either 10 nM estrogen (17 $\beta$ -estradiol) or DMSO (vehicle control) and transfected with reporter plasmids. Luciferase assays were performed as above after 24 hr. Statistical significance was tested by repeated-measures ANOVA with the Greenhouse-Geisser correction for nonsphericity and by a subsequent Dunnett's multiple-comparisons test in GraphPad Prism.

### Chromatin Immunoprecipitation Assays

Chromatin immunoprecipitation (ChIP) assays were carried out as previously described.<sup>19</sup> GATA3-specific mouse monoclonal antibodies (sc268) were obtained from Santa Cruz Biotech. Precipitate and input were used in qPCR using SYBR green master mix as previously described.<sup>19</sup> Primer sequences are listed in Table S3. Both rs17432750 primer sets gave identical enrichment, and the identity of the larger fragment was confirmed by Sanger sequencing. All values obtained were normalized to input, and enrichment was given in relation to the negative *CCND1* (MIM 168461) control. Allele-specific ChIP was carried out with a TaqMan SNP genotyping assay (Applied Biosystems) on the ChIP material. In the TaqMan assay, two different fluorophores were each linked to a probe detecting the two different alleles. Each allele was subsequently amplified with an Applied Biosystems Real Time PCR machine (7900HT), and the data were analyzed with the SDS software. The SDS software converts raw data to fluorescence intensity for each allele and then plots the results as a scatter graph of allele X versus allele Y. We tested the accuracy of this assay by genotyping known mixtures of homozygous ZR751 and T47D (C/C) and MDA-MB0-468 (A/A) cell-line DNA (Figure S1). For the allelic discrimination, three independent experiments were carried out and gave similar results; a representative example is shown.

### GATA3 siRNA Knockdown for Reporter Assay

*GATA3* (MIM 131320; L-003781-00) and nontargeting (D-001810-10-20) ON-TARGETplus SMARTpool siRNAs were purchased from Thermo Scientific. For knockdown, Bre-80 cells were cotransfected with the relevant luciferase reporter plasmids and 100 nM of either *GATA3* or nontargeting siRNAs with Lipofectamine 2000. Luciferase assays were performed as described above after 24 hr. qPCR was performed as described previously<sup>17</sup> to validate *GATA3* knockdown (Figure S9).

### Analysis of Expression Quantitative Trait Loci

Analysis of expression quantitative trait loci (eQTLs) was undertaken in two sample sets of adjacent normal breast samples from women of European descent: the first set contained 135 samples collected for the Molecular Taxonomy of Breast Cancer International Consortium (METABRIC) study,<sup>20</sup> and the second set contained 56 samples extracted from The Cancer Genome Atlas (TCGA) breast cancer study.<sup>21</sup> Matched gene expression (Illumina HT-12 v3 microarray for the METABRIC data; Agilent G4502A-07-3 microarray for the TCGA data) and germline SNP data that were either genotyped (Affymetrix SNP 6.0) or imputed (1000 Genomes Project March 2012 data, IMPUTE 2.0) were used. Correlations between all imputed and genotyped variants at the 5q11.2 locus and expression levels of eight (METABRIC) or four (TCGA) genes present in the fine-mapped region were assessed with a linear regression model in which an additive effect on expression level was assumed for each copy of the rare allele. Calculations

were carried out with the eMap library in R on the METABRIC data and with SNPTEST software<sup>22</sup> on the TCGA data.

## Results

### Genotyping of Case-Control Studies

Three hundred SNPs at the 5q11.2 locus (GRCh37 positions 55,983,657–56,288,810) were successfully genotyped with the iCOGs chip in 103,991 breast cancer case and control individuals from 52 BCAC studies, of which 41 included individuals of European ancestry (46,451 case and 42,599 control subjects), nine included individuals of Asian ancestry (6,269 case and 6,624 control subjects), and two included individuals of African American ancestry (1,116 case and 932 control subjects). Using these data, together with data on a further 16 SNPs genotyped in two BCAC studies (SEARCH and the combined Copenhagen studies CPGS and CCHS), we imputed genotypes for 909 (out of a possible 911) variants with MAF > 0.02 and imputation  $r^2 > 0.3$  by using the January 2012 release of the 1000 Genomes Project as a reference.

### Potential Breast Cancer Risk Signals in European Studies

Figure 1A shows the Manhattan plot of the 909 genotyped and imputed SNPs ( $r^2 > 0.3$ ) for overall breast cancer risk in European studies. Genotype and association results for all 909 SNPs are presented in Table S4. Five hundred and forty-one variants display association with overall breast cancer risk at  $p_{\text{trend}} < 10^{-4}$  (Table S5). All associations are consistent with a log-additive model.

In a forward stepwise conditional analysis using the SNPs listed in Table S5, the best model included three SNPs: (1) rs62355902 (conditional p value [ $p_{\text{cond}}$ ] =  $8.6 \times 10^{-26}$ ), (2) rs113317823 ( $p_{\text{cond}} = 2.8 \times 10^{-5}$ ), and (3) rs11949391 ( $p_{\text{cond}} = 9.7 \times 10^{-5}$ ). No significant evidence of heterogeneity was observed among ORs for these SNPs among studies of European ancestry (minimum observed  $p_{\text{het}} = 0.14$  and maximum  $I^2 = 19.3\%$  for SNP rs11949391; Figure S2). Each SNP remaining in the conditional-analysis model indicates the existence of a separate genetic risk signal (previously defined<sup>23</sup> as an independent set of correlated highly associated variants [iCHAV]), each of which will contain at least one directly causal variant.

The most significantly associated variant overall was rs62355902 (OR per minor allele = 1.21, 95% CI = 1.19–1.24,  $p_{\text{trend}} = 9.5 \times 10^{-49}$ ). This was the most significant of 15 strongly correlated SNPs ( $r^2 > 0.93$ ) lying within a 50 kb interval (GRCh37 positions 56,003,831–56,053,745, marked in red in Table S5); we designated these SNPs as iCHAV1. These iCHAV1 SNPs all had likelihood ratios of <100:1 in relation to the best candidate SNP (rs62355902) and thus could not be excluded from further analysis, given that they remained strong candidate causal variants on the basis of epidemiological

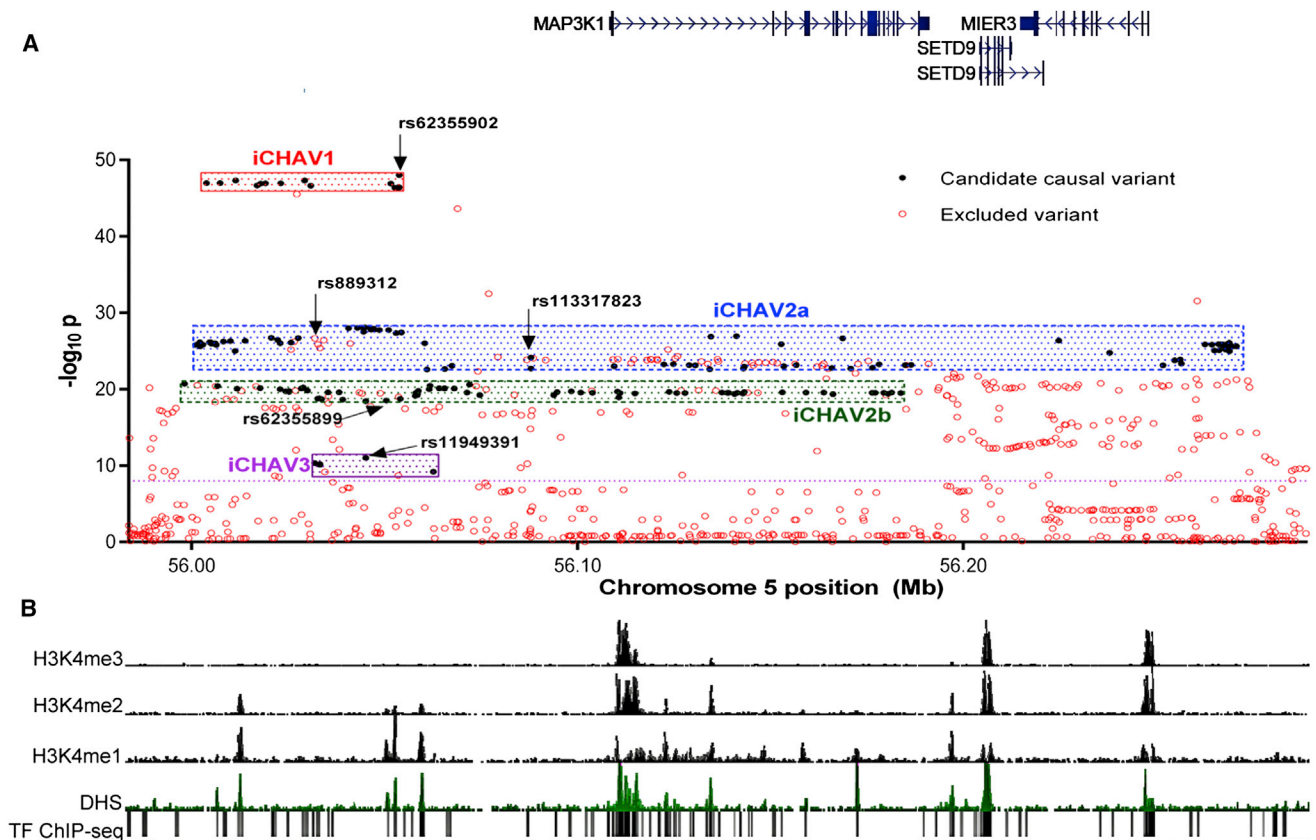

**Figure 1. Genetic Mapping and Chromatin State of the 5q11.2 Locus**

(A) Manhattan plot of overall breast cancer risk in Europeans at the 5q11.2 locus. SNPs are plotted on the basis of their chromosomal position on the x axis and p values ( $\log_{10}$  values) for association. The span of the iCHAVs in terms of chromosomal location and p value is displayed with shading, and candidate causal variants from the iCHAV are colored black. The lead SNPs from each iCHAV, the original GWAS tag SNP (rs889312), and the three genes present in the region are shown. The dotted line intersects the y axis at  $p = 10^{-8}$  and indicates conventional genome-wide significance.

(B) The chromatin state of the 5q11.2 locus in human mammary epithelial cells is shown with ENCODE ChIP-seq data from H3K4me3, H3K4me2, H3K4me1, and DNaseI studies accessed from the UCSC Genome Browser. Transcription factor (TF) binding from ENCODE ChIP-seq studies of 161 TFs in 91 cell lines is also displayed.

evidence. After conditioning on iCHAV1 top SNP rs62355902, the most strongly associated variant was SNP rs113317823 (OR per minor allele = 1.22, 95% CI = 1.18–1.26,  $p_{\text{trend}} = 7.0 \times 10^{-25}$ ; conditional OR = 1.12, 95% CI = 1.05–1.20,  $p_{\text{cond}} = 2.8 \times 10^{-5}$ ). One hundred and seventy-two variants had likelihood ratios of <100:1 in relation to rs113317823, and these constituted iCHAV2 (highlighted in shades of blue and yellow in Table S5). SNP rs113317823 was partially correlated with iCHAV1 top candidate rs62355902 ( $r^2 = 0.19$ ), and this added complexity to the subsequent analysis—this is explored in more detail by the haplotype analysis described below.

After adjustment for the top iCHAV1 (rs62355902) and iCHAV2 (rs113317823) SNPs, the best remaining significantly associated SNP was rs11949391 in iCHAV3 (OR per minor allele = 0.91, 95% CI = 0.89–0.94,  $p_{\text{trend}} = 9.4 \times 10^{-12}$ ; conditional OR = 0.95, 95% CI = 0.92–0.98,  $p_{\text{cond}} = 9.7 \times 10^{-5}$ ). Four other SNPs had likelihood ratios of <100:1 in relation to rs11949391 ( $r^2 \geq 0.95$ ), but not with either of

the top iCHAV1 or iCHAV2 SNPs ( $r^2 < 0.04$ , marked in yellow in Table S5), and these were thus candidate causal variants for iCHAV3.

#### Effects on ER<sup>+</sup> and ER<sup>-</sup> Tumor Subtypes

Candidate causal SNPs in iCHAV1 were associated with risks of both ER<sup>+</sup> and ER<sup>-</sup> disease (Table S5). However, the OR was greater for ER<sup>+</sup> disease (rs62355902, OR = 1.24, 95% CI = 1.21–1.27) than for ER<sup>-</sup> disease (OR = 1.10, 95% CI = 1.05–1.15, p difference [ $p_{\text{diff}}$ ] =  $1.5 \times 10^{-5}$ ; Table 1). By contrast, the minor alleles of candidate causal SNPs in iCHAV3 were protective against ER<sup>+</sup> tumor development (rs11949391, OR = 0.90, 95% CI = 0.87–0.93,  $p = 1.0 \times 10^{-10}$ ) but had no apparent effect on ER<sup>-</sup> tumor risk (OR = 1.01, 95% CI = 0.96–1.06,  $p = 0.81$ ,  $p_{\text{diff}} = 1.3 \times 10^{-4}$ ; Table 1). The lead SNP in iCHAV2, rs113317823, remained significantly associated with ER<sup>+</sup> tumor risk ( $p_{\text{cond}} = 9.7 \times 10^{-5}$  after adjustment for rs62355902), but not with ER<sup>-</sup> tumor risk ( $p_{\text{cond}} = 0.099$ ), but the difference in the OR by ER subtype was only borderline significant ( $p_{\text{diff}} = 0.02$ ; Table 1).

**Table 1. The Best Candidate Variants Representing the Four iCHAVs with the Strongest Effects on Breast Cancer Risk in European Studies**

| iCHAV | SNP         | Chr Position (GRCh37) | Alleles (Major/Minor) | MAF  | MAF SNP | iCHAV1 | r <sup>2</sup> with Lead SNP | Overall Breast Cancer Risk |             |                          |                         | ER <sup>+</sup> Breast Cancer Risk |             |                          |                         | ER <sup>-</sup> Breast Cancer Risk |             |                         |                         |                         |
|-------|-------------|-----------------------|-----------------------|------|---------|--------|------------------------------|----------------------------|-------------|--------------------------|-------------------------|------------------------------------|-------------|--------------------------|-------------------------|------------------------------------|-------------|-------------------------|-------------------------|-------------------------|
|       |             |                       |                       |      |         |        |                              | OR                         | (95% CI)    | P <sub>trend</sub>       | P <sub>cond</sub>       | OR                                 | (95% CI)    | P <sub>trend</sub>       | P <sub>cond</sub>       | OR                                 | (95% CI)    | P <sub>trend</sub>      | P <sub>cond</sub>       | OR                      |
| 1     | rs62355902  | 56,053,723            | A/T                   | 0.18 | -       | 0.95   | -                            | 1.21                       | (1.19–1.24) | 9.50 × 10 <sup>-49</sup> | -                       | 1.24                               | (1.21–1.27) | 5.71 × 10 <sup>-44</sup> | -                       | 1.10                               | (1.05–1.15) | 3.02 × 10 <sup>-4</sup> | -                       | 1.47 × 10 <sup>-5</sup> |
| 2a    | rs113317823 | 56,087,883            | C/T                   | 0.08 | 0.19    | 0.72   | -                            | 1.22                       | (1.18–1.26) | 7.00 × 10 <sup>-25</sup> | 1.61 × 10 <sup>-5</sup> | 1.24                               | (1.20–1.29) | 2.02 × 10 <sup>-21</sup> | 9.74 × 10 <sup>-5</sup> | 1.12                               | (1.05–1.20) | 2.56 × 10 <sup>-3</sup> | 9.90 × 10 <sup>-2</sup> | 1.93 × 10 <sup>-2</sup> |
| 2b    | rs62355899  | 56,050,465            | A/G                   | 0.13 | 0.62    | 1.00   | -                            | 1.15                       | (1.12–1.18) | 2.98 × 10 <sup>-19</sup> | 3.04 × 10 <sup>-3</sup> | 1.17                               | (1.13–1.20) | 5.52 × 10 <sup>-18</sup> | 2.04 × 10 <sup>-3</sup> | 1.08                               | (1.02–1.14) | 1.11 × 10 <sup>-2</sup> | 5.42 × 10 <sup>-1</sup> | 1.86 × 10 <sup>-2</sup> |
| 3     | rs11949391  | 56,045,081            | T/C                   | 0.16 | 0.04    | 1      | -                            | 0.91                       | (0.89–0.94) | 9.36 × 10 <sup>-12</sup> | 5.57 × 10 <sup>-5</sup> | 0.90                               | (0.87–0.93) | 1.00 × 10 <sup>-10</sup> | 1.44 × 10 <sup>-4</sup> | 1.01                               | (0.96–1.06) | 8.14 × 10 <sup>-1</sup> | 3.50 × 10 <sup>-1</sup> | 1.27 × 10 <sup>-4</sup> |

Single-SNP risk estimates for the top candidates in each iCHAV as well as overall breast cancer risk and subtypes by estrogen receptor status. Results are given as ORs with 95% CI (with the minor variant alleles as the reference), per-allele P<sub>trend</sub>, and P<sub>cond</sub> (P<sub>cond</sub> is conditional on the iCHAV1 lead SNP rs62355902). The P<sub>diff</sub> for ER status is from a case-only analysis comparing the effect sizes between the ER<sup>+</sup> and ER<sup>-</sup> subtypes. The complete list of variants for these iCHAVs can be found in Table S7.

### Effects of Haplotypes on Breast Cancer Risk

Whereas iCHAV1 and iCHAV3 represent sets of highly correlated SNPs ( $r^2 > 0.93$  with the lead SNP), the set of 173 SNPs, labeled iCHAV2, includes three subsets defined according to their correlations with rs113317823 (iCHAV2) and rs62355902 (iCHAV1). These subsets are (1) iCHAV2a (lead SNP rs113317823), which includes 90 SNPs correlated with rs113317823 ( $r^2 > 0.53$ ) and iCHAV1 SNP rs62355902 ( $r^2 = 0.19–0.29$ ) and is marked in dark blue in Table S5; (2) iCHAV2b (lead SNP rs62355899), which includes 66 SNPs independent of rs113317823 ( $r^2 \leq 0.01$ ) but correlated with rs62355902 ( $r^2 = 0.59–0.62$ ) (conditional OR = 0.90, 95% CI = 0.86–0.95,  $p_{\text{cond}} = 3.0 \times 10^{-5}$ ) and is marked in teal in Table S5; and (3) iCHAV2c (lead SNP rs7721581), which includes 17 SNPs that are modestly correlated with rs113317823 ( $r^2 = 0.14–0.16$ ) but independent of rs62355902 ( $r^2 \leq 0.01$ ) (conditional OR = 0.96, 95% CI = 0.93–0.98,  $p_{\text{cond}} = 4.8 \times 10^{-4}$ ) and is marked in pale blue Table S5.

To further clarify these association signals, we performed haplotype analyses based on the lead SNPs from iCHAV1, iCHAV2a, iCHAV2b, iCHAV2c, and iCHAV3. These five SNPs define seven common haplotypes (Table 2). Two of these—h5 (which carries the risk alleles of iCHAV1, iCHAV2a, and iCHAV2b) and h6 (which carries the risk alleles of iCHAV1 and iCHAV2b)—are strongly associated with risk, although the risk is higher for haplotype h6 ( $p = 1.66 \times 10^{-29}$ ). These results are consistent with the observation that SNPs in iCHAV1 are the most strongly associated with risk. They are also consistent with a model in which either a SNP in iCHAV2a or iCHAV2c (in combination with iCHAV1) increases risk or a SNP in iCHAV2b reduces risk. These hypotheses are difficult to distinguish given that the iCHAV1 risk allele never occurs alone—it occurs in combination with either iCHAV2a or iCHAV2c or with iCHAV2b, but not both. Some support for the iCHAV1+iCHAV2a hypothesis is provided by the fact that although rare, haplotypes h3 and h4, which carry the risk alleles for iCHAV2a, but not iCHAV1, are associated with increased risk. Evidence against the iCHAV1+iCHAV2c hypothesis is provided by the fact that h1, which carries the risk allele for iCHAV2c alone, is not associated with increased risk. These observations are consistent with the regression analyses, in which iCHAV2c was less likely than iCHAV2a or iCHAV2b SNPs to harbor a causal variant (likelihood ratio ~ 30:1 after adjustment for iCHAV1). Haplotype h2, which carries the minor allele of iCHAV3 SNP rs11949391, was associated with a reduced ER<sup>+</sup> (but not ER<sup>-</sup>) breast cancer risk, consistent with the effect of the iCHAV3 SNP in the regression analysis.

We conclude that at least one of the 90 SNPs in iCHAV2a (positions 56,001,002–56,270,717) or one of the 66 SNPs in iCHAV2b (positions 55,998,085–56,183,743) is causally related to risk together with a variant in iCHAV1 and a variant in iCHAV3.

**Table 2. Breast Cancer Risk in Europeans by Haplotypes of Five iCHAV Representative SNPs**

|                                          | Haplotype <sup>a</sup> |                         |                         |                         |                         |                          |                          |
|------------------------------------------|------------------------|-------------------------|-------------------------|-------------------------|-------------------------|--------------------------|--------------------------|
|                                          | h <sub>0</sub>         | h <sub>1</sub>          | h <sub>2</sub>          | h <sub>3</sub>          | h <sub>4</sub>          | h <sub>5</sub>           | h <sub>6</sub>           |
| iCHAV1 <sup>b</sup>                      | 1                      | 1                       | 1                       | 1                       | 1                       | 2                        | 2                        |
| iCHAV2a <sup>c</sup>                     | 1                      | 1                       | 1                       | 2                       | 2                       | 1                        | 2                        |
| iCHAV2b <sup>d</sup>                     | 1                      | 1                       | 1                       | 1                       | 1                       | 2                        | 1                        |
| iCHAV2c <sup>e</sup>                     | 1                      | 2                       | 1                       | 1                       | 2                       | 1                        | 2                        |
| iCHAV3 <sup>f</sup>                      | 1                      | 1                       | 2                       | 1                       | 1                       | 1                        | 1                        |
| Frequency                                | 0.52                   | 0.12                    | 0.15                    | 0.02                    | 0.01                    | 0.11                     | 0.05                     |
| <b>Overall Breast Cancer Risk</b>        |                        |                         |                         |                         |                         |                          |                          |
| OR                                       | –                      | 1.01                    | 0.95                    | 1.08                    | 1.05                    | 1.16                     | 1.31                     |
| 95% CI                                   | –                      | 0.99–1.05               | 0.92–0.97               | 0.99–1.17               | 0.99–1.17               | 1.12–1.20                | 1.25–1.37                |
| p value                                  | –                      | 4.50 × 10 <sup>-1</sup> | 2.08 × 10 <sup>-4</sup> | 7.57 × 10 <sup>-2</sup> | 3.81 × 10 <sup>-1</sup> | 2.00 × 10 <sup>-20</sup> | 1.66 × 10 <sup>-29</sup> |
| <b>ER<sup>+</sup> Breast Cancer Risk</b> |                        |                         |                         |                         |                         |                          |                          |
| OR                                       | –                      | 1.03                    | 0.95                    | 1.13                    | 0.99                    | 1.19                     | 1.34                     |
| 95% CI                                   | –                      | 0.99–1.07               | 0.92–0.99               | 1.02–1.24               | 0.87–1.13               | 1.14–1.23                | 1.27–1.42                |
| p value                                  | –                      | 1.12 × 10 <sup>-1</sup> | 5.23 × 10 <sup>-3</sup> | 1.68 × 10 <sup>-2</sup> | 8.75 × 10 <sup>-1</sup> | 9.37 × 10 <sup>-20</sup> | 3.74 × 10 <sup>-27</sup> |
| <b>ER<sup>-</sup> Breast Cancer Risk</b> |                        |                         |                         |                         |                         |                          |                          |
| OR                                       | –                      | 1.04                    | 1.04                    | 1.08                    | 1.17                    | 1.1                      | 1.15                     |
| 95% CI                                   | –                      | 0.98–1.11               | 0.98–1.10               | 0.92–1.27               | 0.96–1.42               | 1.04–1.18                | 1.05–1.25                |
| p value                                  | –                      | 2.08 × 10 <sup>-1</sup> | 1.67 × 10 <sup>-1</sup> | 3.45 × 10 <sup>-1</sup> | 1.12 × 10 <sup>-1</sup> | 1.82 × 10 <sup>-3</sup>  | 3.64 × 10 <sup>-3</sup>  |

1 represents major alleles, and 2 represents minor alleles in each SNP.

<sup>a</sup>h<sub>1</sub>–h<sub>6</sub> are compared to h<sub>0</sub> (the reference haplotype carrying the major alleles of all five SNPs).

<sup>b</sup>iCHAV1 represents 15 SNPs, of which rs62355902 is the best candidate.

<sup>c</sup>iCHAV2a represents 90 SNPs that have r<sup>2</sup> ≥ 0.53 with rs113317823 and r<sup>2</sup> = 0.19–0.29 with rs62355902. rs113317823 is the best candidate.

<sup>d</sup>iCHAV2b represents 66 SNPs that have r<sup>2</sup> ≤ 0.01 with rs113317823 and r<sup>2</sup> = 0.59–0.62 with rs62355902; rs62355899 is the best candidate.

<sup>e</sup>iCHAV2c represents 17 SNPs that have r<sup>2</sup> = 0.14–0.16 with rs113317823 and r<sup>2</sup> ≤ 0.01 with rs6235590; rs7721581 is the best candidate.

<sup>f</sup>iCHAV3 represents five SNPs, of which rs11949391 is the best candidate.

### Risk Associations in Asian and African American Studies

We tested all genotyped and imputed SNPs with MAF > 0.02 and imputation r<sup>2</sup> > 0.3 in the nine Asian studies (6,269 case and 6,624 control individuals; 1,045 SNPs) and the two African American studies (1,116 case and 932 control individuals; 1,601 SNPs) for association with overall breast cancer risk. None reached genome-wide levels of significance (p < 5 × 10<sup>-8</sup>), but the lead SNPs of each iCHAV displayed compatible effects in all three ethnic groups. This was most apparent for iCHAV2a SNP rs113317823 (European unadjusted OR = 1.22, 95% CI = 1.18–1.26, p<sub>trend</sub> = 7.0 × 10<sup>-25</sup>; Asian OR = 1.19, 95% CI = 1.11–1.27, p<sub>trend</sub> = 1.4 × 10<sup>-5</sup>; African American OR = 1.04, 95% CI = 0.77–1.31, p<sub>trend</sub> = 0.78; Table S6).

### Identification of PREs that Interact with the MAP3K1 Promoter

After the epidemiological analyses, 15 iCHAV1, 90 iCHAV2a, 66 iCHAV2b, and 5 iCHAV3 variants remained as strong causal candidates (Figure 1A; Table S7), whereas the data provide weaker support that iCHAV2c is causal.

Because iCHAV2a and iCHAV2b were composed of a large number of variants, we prioritized these for functional analysis by using a threshold of p<sub>cond</sub> < 1 × 10<sup>-4</sup> and focused on the remaining 30 iCHAV2a and 10 iCHAV2b variants, in addition to the iCHAV1 and iCHAV3 candidates. Next, we examined whether these 62 iCHAV variants coincide with PREs that might affect gene expression.

Using publicly available ENCODE ChIP sequencing (ChIP-seq) data from MCF7 and human mammary epithelial cells, we identified regions marked by histone modifications associated with transcriptional enhancers (mono- or dimethylation of H3 lysine 4 [H3K4Me1 or H3K4Me2, respectively] and acetylation of H3 lysine 27 [H3K27Ac]) or bound by transcription factors ER-α, FOXA1, or GATA3, known to play a role in breast cancer. Next, we mined RNA polymerase II ChIA-PET (chromatin-interaction analysis with paired-end tag sequencing) data, previously generated in MCF7 cells,<sup>24,25</sup> and identified multiple long-range chromatin interactions between discrete regions of the iCHAV loci and the promoter of MAP3K1 (Figure S3). Consequently, we performed 3C experiments to analyze interactions between the MAP3K1 promoter and these regions



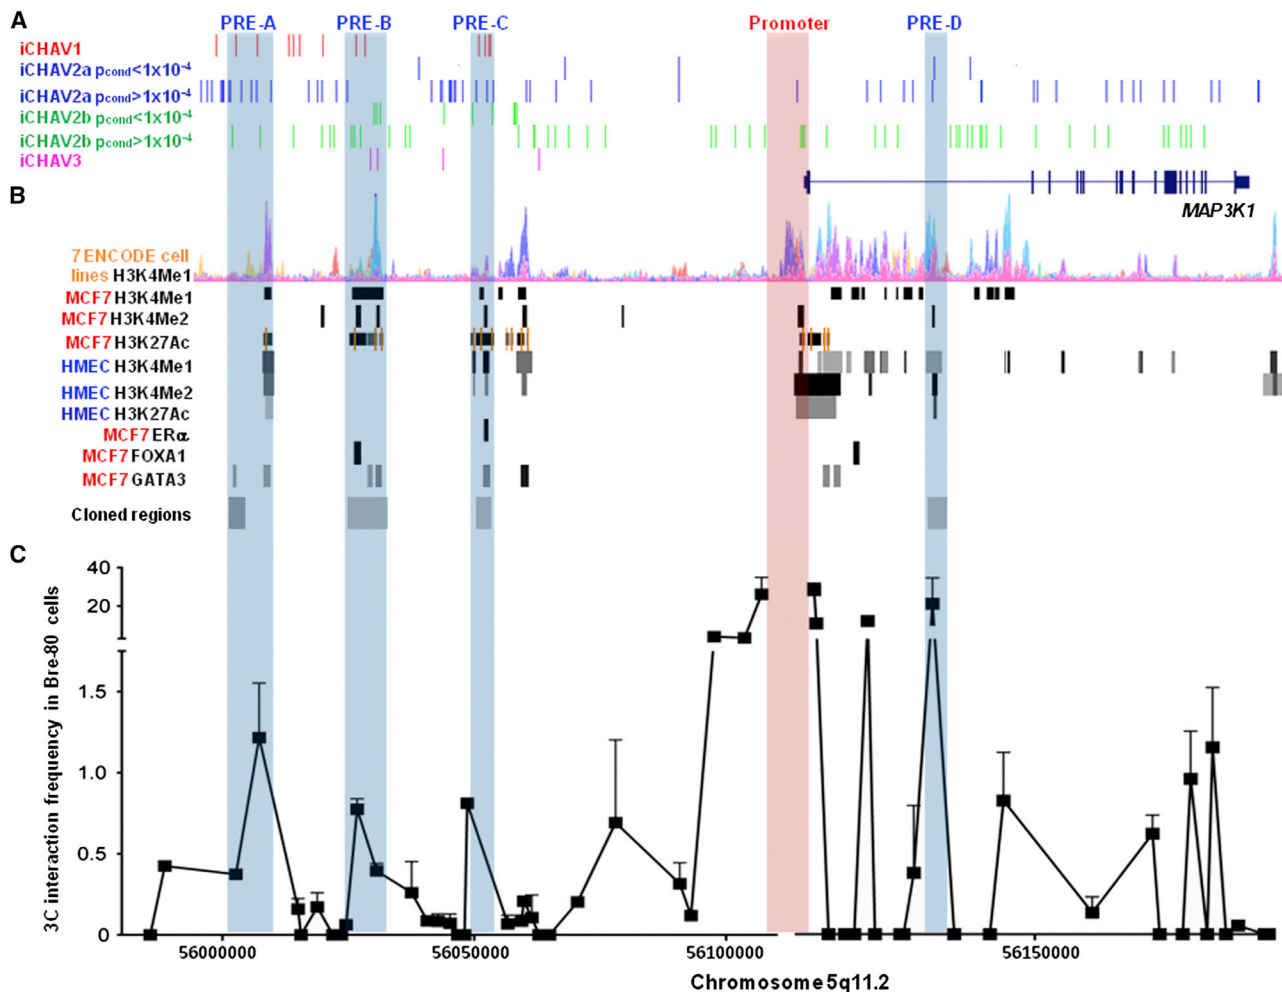

**Figure 2. Candidate Causal Variants Are Located in PREs that Interact with the *MAP3K1* Promoter**

(A) The candidate causal variants associated with breast cancer risk from iCHAV1, iCHAV2a, iCHAV2b, and iCHAV3 were mapped to PREs at the 5q11.2 locus.

(B) PREs (highlighted) were identified with ChIP-seq data (H3K4Me1 studies in seven ENCODE cell lines [GM12878, H1-hESC, HSMM, HUVEC, K562, NHEK, and NHLF]; H3K4Me1 and H3K4Me2 in MCF7 and human mammary epithelial cells [HMECs]; and transcription factors ER- $\alpha$ , FOXA1, and GATA3 in MCF7 cells) accessed from the UCSC Genome Browser. Regions cloned into reporter gene constructs are also shown.

(C) 3C analysis of interactions between EcoRI fragments at the 5q11.2 locus, encompassing the PREs coinciding with candidate causal variants, and the *MAP3K1* promoter in Bre-80 cells (error bars represent SD, and a representative graph is shown).

within 5q11.2. Using 3C in a normal mammary epithelial cell line, Bre-80, we found several regions that interacted with the *MAP3K1* promoter (Figure 2C). Similar 3C profiles were observed in two ER<sup>+</sup> cell lines (MCF7 and T-47D) and in ER<sup>-</sup> MDA-MB231 breast cancer cells. (Figure S4).

PREs were defined as the loci encompassing functional elements identified from the ENCODE data within a region interacting with the *MAP3K1* promoter. This analysis revealed four PREs (PRE-A, PRE-B, PRE-C, and PRE-D) that coincided with the iCHAV candidates prioritized for functional analyses (Figure 2). Consistently, ENCODE ChIA-PET data demonstrated that all four PREs interacted with the *MAP3K1* promoter (Figure S3A), but not with the promoters of other nearby genes in MCF7 cells (Figure S3B). It should be noted that all four PREs contained iCHAV2a or iCHAV2b variants ( $p_{\text{cond}} > 1 \times 10^{-4}$ ) that were not prior-

itized for functional analyses but could not be excluded as causal candidates after the log-likelihood testing (Figure 2A). Furthermore, additional PREs, some containing such iCHAV2a or iCHAV2b variants, were apparent at this locus (Figure 2). Twenty-six percent of the 62 iCHAV variants prioritized for functional analyses coincided with a PRE. In contrast, only 16% of SNPs with a MAF in the range of the MAF of the prioritized iCHAV variants (dbSNP 138, MAF = 0.04–0.18, accessed through the UCSC Genome Browser) at this locus were located in a PRE.

#### The Risk Alleles of iCHAV1 Candidates rs74345699 and rs62355900 Further Induce PRE-C Enhancer Activity after Estrogen Stimulation

For functional analysis of iCHAV1, we focused on 7 of the 15 candidate causal variants coinciding with a PRE (PRE-A,

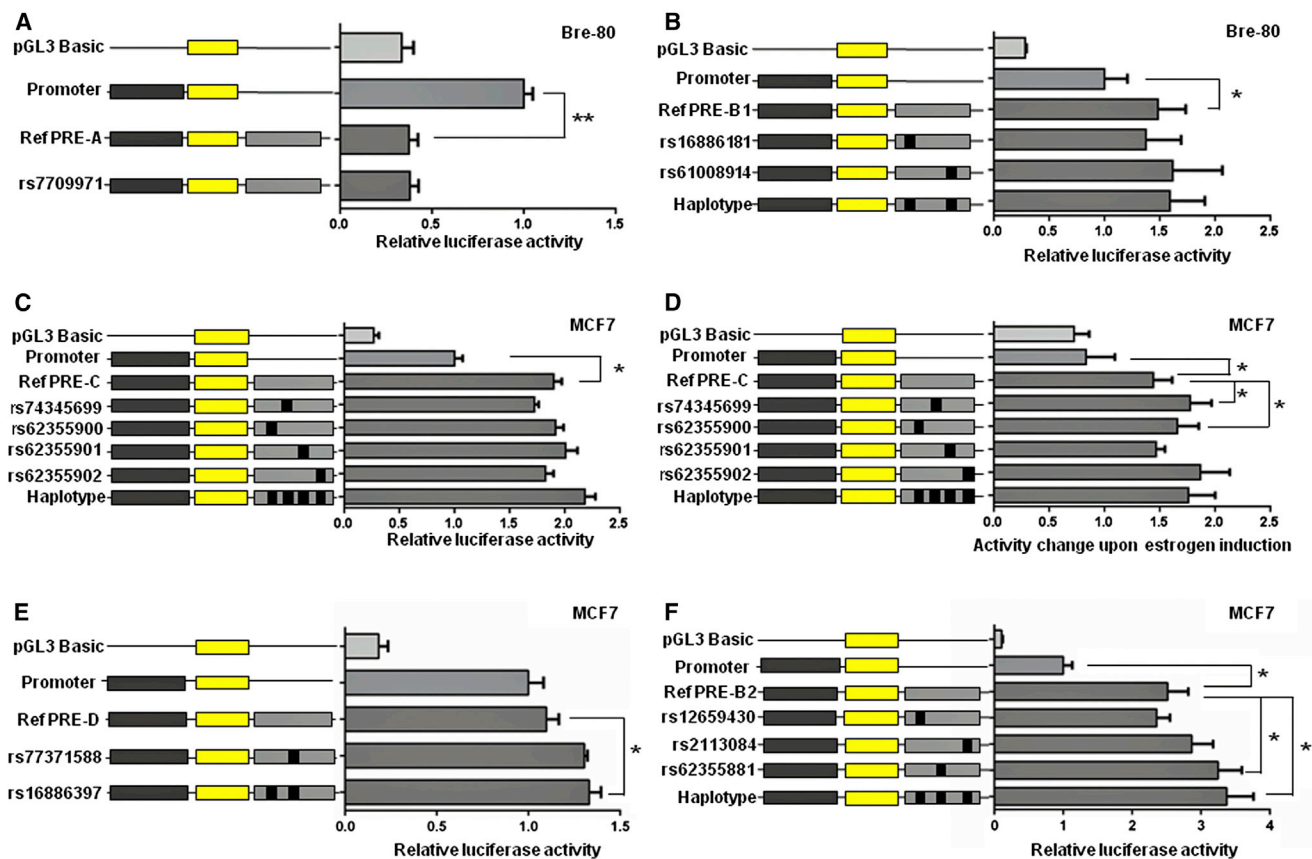

**Figure 3. Risk Alleles of iCHAV1 and iCHAV2a SNPs Enhance *MAP3K1* Promoter Activity in Luciferase Reporter Assays**

PRE-A, PRE-B, PRE-C, and PRE-D regions containing the major allelic variants of iCHAV1, iCHAV2a, and iCHAV2b SNPs were cloned downstream of a *MAP3K1*-promoter-driven luciferase construct (promoter) for the creation of reference (ref) PRE constructs. Minor allelic variants of the iCHAV1, iCHAV2a, and iCHAV2b SNPs were engineered into the constructs and are designated by the rs ID of the corresponding SNP. Constructs containing minor allelic haplotypes (haplotype) were also generated. Cells were transiently transfected with each of these constructs and assayed for luciferase activity after 24 hr.

(A and B) Results from assays of PRE-A (A) and PRE-B1 (B) in Bre-80 cells.

(C, E, and F) Results from assays of PRE-C (C), PRE-D (E), and PRE-B2 (F) in MCF7 cells under basal conditions.

(D) Results after estrogen induction of MCF7 cells. For each reporter construct in this assay, the luciferase activity of estrogen-treated cells was normalized to the activity of the corresponding vehicle-treated cells.

Error bars denote the SEM from three experiments performed in triplicate. p values were determined by repeated-measures ANOVA followed by Dunnett's multiple comparisons test (\* $p < 0.05$  and \*\* $p < 0.01$ ).

PRE-B, and PRE-C; Figure 2). We first examined the effects of these PREs on *MAP3K1* promoter activity by cloning the relevant genomic regions into luciferase reporter gene constructs containing the *MAP3K1* promoter. All three of the PREs had effects on *MAP3K1* promoter activity: PRE-A acted as a silencer and reduced promoter activity by 62% ( $p = 0.006$ ) in Bre-80 cells (Figure 3A) and had a similar but nonsignificant trend ( $p = 0.056$ ) in MCF7 cells (Figure S5A). PRE-B1, a PRE-B subregion containing two candidate variants, acted as an enhancer in Bre-80 cells and increased promoter activity by 42% ( $p = 0.047$ ; Figure 3B) but had no significant effect on MCF7 cells, indicating that PRE-B1 might function in specific breast cell types (Figure S5B). PRE-C acted as an enhancer and increased *MAP3K1* promoter activity by 90% ( $p = 0.034$ ) in MCF7 cells (Figure 3C) and by 77% ( $p = 0.034$ ) in Bre-80 cells (Figure S5D). Introduction of the iCHAV1 minor alleles into the PRE-A, PRE-B1, and PRE-C reference con-

structs did not detectably alter *MAP3K1* promoter activity (Figures 3A–3C; Figures S5A, S5B, and S5D).

ChIP-seq data from the ENCODE project indicate that at least two different transcription factors implicated in estrogen signaling, FOXA1 and ER- $\alpha$ , bind within PRE-B1 and PRE-C, respectively (Figure 2B). We thus tested whether the iCHAV1 candidates within PRE-B1 and PRE-C confer estrogen-dependent effects on *MAP3K1* promoter activity. We first confirmed that *MAP3K1* expression was upregulated by estrogen stimulation (Figure S6). Then, using reporter assays, we examined the effects of estrogen induction on PRE-B1 and PRE-C by measuring the changes in *MAP3K1* promoter activity between estrogen-stimulated and -unstimulated cells. We showed that compared with the promoter construct, the PRE-C enhancer containing the protective (major) alleles (Figure 3D), but not PRE-B1 (Figure S5C), had a significant induction in activity (72%,  $p = 0.012$ ) after estrogen stimulation. Induction was

23% ( $p = 0.032$ ) and 15% ( $p = 0.011$ ) greater in PRE-C enhancers containing the risk (minor) alleles of iCHAV1 candidate SNPs rs74345699 and rs62355900, respectively, than in this reference PRE-C enhancer (Figure 3D). Of note, neither of these candidates significantly affected *MAP3K1* promoter activity in the absence of estrogen.

#### The Risk Allele of iCHAV2a Candidate rs16886397 in PRE-D Enhances *MAP3K1* Promoter Activity

Of the 30 candidate causal variants for iCHAV2a at  $p_{\text{cond}} < 1 \times 10^{-4}$ , one variant (rs77371588) coincided with a PRE (Figure 2), and we thus prioritized this SNP for functional analysis. Using luciferase reporter assays, we demonstrated that the reference PRE-D acted as an enhancer of the *MAP3K1* promoter in Bre-80 cells and increased *MAP3K1* promoter activity by 69% ( $p = 0.013$ ; Figure S7A). The PRE-D enhancer containing the risk (minor) allele of rs77371588 had 23% greater enhancer activity than the reference PRE-D, but this effect did not reach statistical significance ( $p = 0.103$ ; Figure S7A). By contrast, the same PRE-D reference construct did not affect *MAP3K1* promoter activity in MCF7 cells, nor did the introduction of the risk allele of rs77371588 into PRE-D significantly alter its activity (Figure 3E). Because we had generated the PRE-D construct, it was straightforward to test rs16886397, an additional iCHAV2a causal candidate located in PRE-D. It did not reach the threshold for the functional prioritization ( $p_{\text{cond}} < 1 \times 10^{-4}$ ) but did pass the likelihood-ratio threshold of <100:1 for defining the causal iCHAV candidates. In MCF7 cells, the construct containing the minor (risk) allele of rs16886397 had 21% ( $p = 0.049$ ) greater *MAP3K1* promoter activity than the reference PRE-D (Figure 3E), and thus rs16886397 appears to confer enhancer activity on PRE-D. In Bre-80 cells, in contrast, the minor allele of rs16886397 had no effect on PRE-D activity (Figure S7A).

#### The Minor Allele of iCHAV2b Candidate rs62355881 Increases PRE-B2 Enhancer Activity

Of the ten iCHAV2b candidates at  $p_{\text{cond}} < 1 \times 10^{-4}$ , three variants coincided with PRE-B, and two flanked the boundaries of PRE-C (Figure 2). We prioritized the three variants in PRE-B because these were the most compelling functional candidates given their central location in several functional elements (Figure 2B). Using reporter assays, we demonstrated that the reference PRE-B2 construct (a PRE-B subregion containing the iCHAV2b variants) acted as an enhancer and increased the activity of the *MAP3K1* promoter by 152% ( $p = 0.032$ ; Figure 3F) and 143% ( $p = 0.048$ ; Figure S7B) in MCF7 and Bre-80 cells, respectively. The introduction of the minor (potentially protective) allele of the iCHAV2b candidate rs62355881 into the reference PRE-B2 construct led to a 29% ( $p = 0.017$ ) increase in the enhancer activity of PRE-B2 in MCF7 cells, and the haplotype construct containing the minor alleles of all three iCHAV2b candidates demonstrated a similar effect ( $p = 0.030$ ; Figure 3F). However, these effects were not

seen in Bre-80 cells (Figure S7B), indicating another cell-type-specific effect, and the other iCHAV2b candidates did not have any effect on PRE-B2 activity in either cell line (Figure 3F; Figure S7B).

#### The Protective Allele of iCHAV3 Candidate rs17432750 Reduces PRE-B3 Enhancer Activity and GATA3 Binding

Of the five iCHAV3 candidates, we focused on two variants coinciding with PRE-B3 (Figure 2B) for functional analysis. Using reporter assays, we demonstrated that the reference PRE-B3 construct (a third subregion of PRE-B), containing the risk (major) iCHAV3 alleles, increased *MAP3K1* promoter activity by 166% ( $p = 0.041$ ; Figure 4A) and 110% ( $p = 0.035$ ; Figure S8A) in Bre-80 and MCF7 cells, respectively. Reversing the orientation of PRE-B3 in the reporter gene construct had no effect on its activity in either cell line (Figures S8B and S8C), indicating that it acts as a typical enhancer. Next, we introduced the protective (minor) alleles of the iCHAV3 candidates into the reference PRE-B3 construct. The protective A allele of rs17432750 had a repressive effect and reduced PRE-B3 enhancer activity by 43% ( $p = 0.024$ ; Figure 4A) in Bre-80 cells. The same allele had a similar but nonsignificant effect ( $p = 0.150$ ) in MCF7 cells (Figure S8A). By contrast, the protective allele of the second iCHAV3 candidate, rs11956804, had no significant effect on enhancer activity in either cell line (Figure 4A; Figure S8A). The haplotype construct containing both iCHAV3 variants also had no significant effect on enhancer activity (Figure 4A; Figure S8A), suggesting the possibility of an interaction between the two iCHAV3 minor alleles in this construct.

We observed from MCF7 ChIP-seq data that a region containing rs17432750 bound the transcription factor GATA3 (Figure 2B) and that the sequence around rs17432750 showed homology to the GATA3 position weight matrix (Figure 4B). Using GATA3 ChIP assays, followed by qPCR detection, we confirmed that compared to the *CCND1* negative control, the sequence surrounding this SNP showed consistent 2-fold enrichment in precipitated DNA (Figure 4C). We also tested the allele specificity of GATA3 binding by using a TaqMan genotyping assay for rs17432750 on ChIP samples from MCF7 cells. The allelic-discrimination plot of these data showed an enrichment of the risk (major) C allele in the GATA3 ChIP samples (Figure 4D). The ratio of the two alleles in three independent ChIP experiments indicated 3.7-fold greater GATA3 binding to the risk C allele than to the protective A allele in MCF7 cells.

To determine whether differential GATA3 transcription factor binding might explain the effects of rs17432750 in the reporter assays, we used siRNA to knock down *GATA3* and found the enhancer activity of the reference PRE-B3 construct, containing the risk C allele, to be reduced by 33% in Bre-80 cells ( $p = 0.001$ ; Figure 4E). *GATA3* knock-down had no effect on the construct containing the protective A allele of rs17432750 or the *MAP3K1* promoter alone (Figure 4E). Diminished GATA3 binding to the

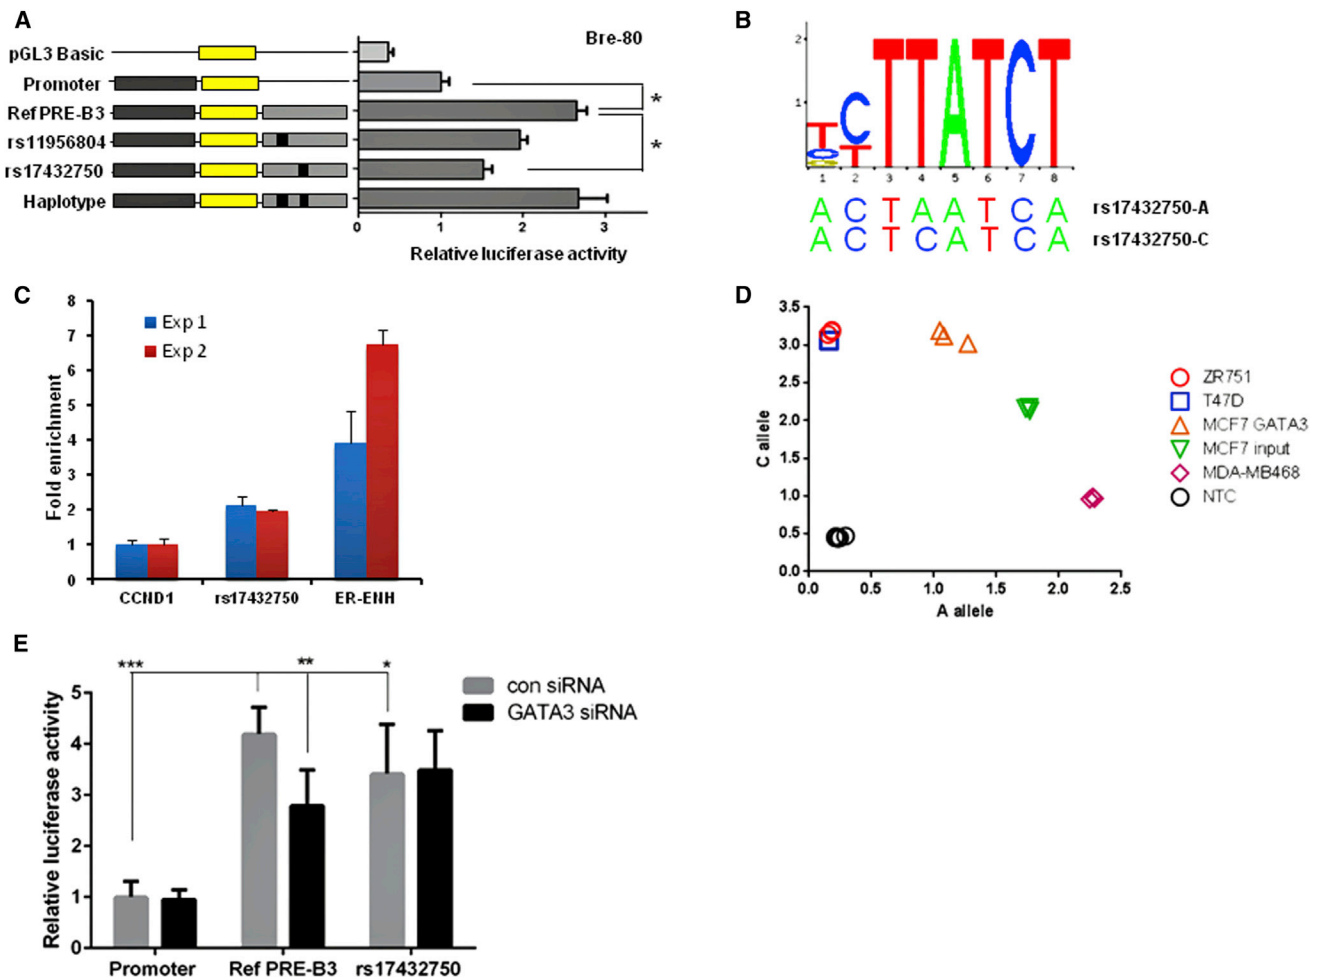

**Figure 4. The Protective Allele of iCHAV3 SNP rs17432750 Demonstrates Diminished PRE-B3 Enhancer Activity in Luciferase Reporter Assays and Reduced GATA3 Binding in ChIP Analysis**

(A) The PRE-B3 region containing the major allelic variants of iCHAV3 SNPs was cloned downstream of a *MAP3K1*-promoter-driven luciferase construct (promoter) for the creation of reference (ref) PRE constructs. Minor allelic variants of iCHAV3 SNPs were engineered into the constructs and are designated by the rs ID of the corresponding SNP. A construct containing the minor allelic haplotypes (haplotype) was also generated. Bre-80 cells were transiently transfected with each of these constructs and assayed for luciferase activity after 24 hr. Error bars denote SEM from three experiments performed in triplicate. p values were determined by repeated-measures ANOVA followed by Dunnett's multiple-comparisons test (\* $p < 0.05$ ).

(B) Position weight matrix of GATA3 is shown in relation to the negative strand of the sequences surrounding rs17432750.

(C) GATA3 ChIP assays demonstrate enrichment of rs17432750 in relation to the *CCND1* negative control. A GATA3 site from the ER- $\alpha$  enhancer was included as a positive control. Results from two biological repeats are shown, and error bars denote SD of three technical repeats.

(D) Genotyping of rs17432750 in MCF7 genomic DNA versus MCF7 GATA3-ChIP DNA. Homozygous cell lines ZR751 (C/C), T47D (C/C), and MDA-MB-468 (A/A) and no template controls (NTCs) were included as references for the assay. The risk (major) C allele was preferentially precipitated in the ChIP experiment.

(E) Luciferase assay in Bre-80 cells shows the effect of *GATA3* siRNA silencing on the activity of the *MAP3K1* promoter alone (promoter) and with PRE-B3 constructs containing the C allele (ref PRE-B3) and protective A (minor) allele rs17432750 (rs17432750). Error bars denote SEM from three experiments performed in triplicate. p values were determined by two-way repeated-measures ANOVA followed by either Sidak's multiple-comparisons test (to analyze the effect of *GATA3* knockdown within constructs) or Dunnett's multiple-comparisons test (to analyze differences in activity between constructs) (\* $p < 0.05$ , \*\* $p < 0.01$ , and \*\*\* $p < 0.001$ ). The level of *GATA3* knockdown is shown in Figure S9.

protective A allele thus appears to be responsible for the observed decrease in PRE-B3 enhancer activity under basal conditions (Figure 4A).

#### eQTL Analyses

Given the findings of these functional studies, an obvious hypothesis is that the candidate causal variants in the

iCHAVs are associated with differences in expression of *MAP3K1* and possibly other local genes in normal breast cells. We therefore explored potential eQTL associations between all locus SNPs and genes lying within ~1 Mb of the locus in 135 normal breast tissue samples from the METABRIC study and 56 further normal breast samples from the TCGA study. Summary results for representative

SNPs from the three iCHAVs are presented in Table S8. None of the iCHAV representative SNPs showed detectable differences in *MAP3K1* expression in this data set. This locus had a positive control eQTL: SNP rs832402 was the most strongly associated SNP in that it showed *SETD9* expression in both METABRIC ( $p = 5.93 \times 10^{-9}$ ) and TCGA ( $p = 1.96 \times 10^{-7}$ ) studies, but it was not a strong candidate SNP for breast cancer risk ( $p_{\text{cond}} = 1.46 \times 10^{-3}$ ). The positive control SNP was in iCHAV2c (correlated with lead SNP rs7721581 at  $r^2 = 0.74$ ), and SNP rs7721581 was consequently also associated, although less significantly, with *SETD9* expression (METABRIC  $p = 4.38 \times 10^{-8}$ ; TCGA  $p = 2.78 \times 10^{-4}$ ). However, because none of the other representative iCHAV SNPs were associated with *SETD9* expression, it appears unlikely that detectable *SETD9* expression differences in normal breast cells are the underlying cause of breast cancer generated by the candidate functional variants we have identified.

## Discussion

In this fine-scale mapping study, we found clear evidence of at least three independent breast cancer risk variants in European women: SNPs in iCHAV1 and iCHAV2 each had the greatest effects on breast cancer in the unadjusted analysis in that their minor alleles conferred increased risks of 25%–30% for ER<sup>+</sup> and ~10% for ER<sup>-</sup> tumor development, whereas the minor alleles of SNPs in iCHAV3 had a protective effect of ~10% against ER<sup>+</sup> breast cancer but no apparent effect on ER<sup>-</sup> tumor risk (Table 1). The originally detected GWAS tag SNP, rs889312, was most correlated with iCHAV1 ( $r^2 = 0.5$ ) and could be excluded from causality within iCHAV1 with a likelihood ratio of  $>10^{21}:1$ . Within iCHAV2, we additionally found evidence of three subsets of variants (iCHAV2a, iCHAV2b, and iCHAV2c) with a range of effects. The epidemiological analyses suggest that iCHAV2c is least likely to be causally related to risk, and we conclude that at least one of the variants in iCHAV2a or iCHAV2b is functional. It should be noted that the correlations between candidate causal SNPs in iCHAV1 and iCHAV2 have added to this analysis and its interpretation a level of complexity that we have not recognized in previous fine-scale mapping studies of breast cancer risk loci.

We separately identified at least four 5q11.2 PREs that contain iCHAV candidate variants and interact with the *MAP3K1* promoter in normal and cancer mammary epithelial cells. 3C analysis indicates that there are long-range chromatin interactions between these PREs and the *MAP3K1* promoter, whereas interactions between the PREs and the promoters of other nearby genes are not evident from available ChIA-PET studies.<sup>24,25</sup> Although we cannot rule out interactions between the iCHAVs and the promoters of other genes in the region, such as *SETD9* or *MIER3* (a proposed candidate gene for this risk locus<sup>26</sup>), we propose that *MAP3K1* is the likely target

gene of the 5q11.2 breast cancer susceptibility locus. Consistent with this proposition and our analyses, Corradin et al. identified an enhancer (chr5: 56,052,477–56,053,943) that coincides with the element we have termed PRE-C and that is predicted to regulate *MAP3K1* on the basis of correlation between cell-type-specific H3K4me1 modification and *MAP3K1* expression data.<sup>27</sup>

Our reporter assays indicate that PRE-B, PRE-C, and PRE-D act as enhancers, whereas PRE-A is a silencer of the *MAP3K1* promoter. Having identified these regulatory elements, we investigated whether the iCHAV candidate causal variants within these PREs detectably modify their regulatory activity. We found that (1) the risk alleles of two iCHAV1 candidates, rs74345699 and rs62355900, in the PRE-C enhancer acted to further induce *MAP3K1* promoter activity in breast cancer cells under estrogen stimulation; (2) the risk allele of iCHAV2a candidate rs16886397 in PRE-D conferred enhancer activity on this PRE for *MAP3K1* promoter activity in breast cancer cells; (3) the potentially protective allele of iCHAV2b candidate rs62355881 in the PRE-B2 enhancer increased *MAP3K1* promoter activity in breast cancer cells; and (4) the protective allele of iCHAV3 SNP rs17432750 diminished the enhancer activity of PRE-B3 for the *MAP3K1* promoter in these cells.

Because of experimental constraints, we were only able to examine the functions of a minority of the iCHAV causal candidates, and we thus cannot exclude the presence of more functional variants across the recognizable iCHAVs. Of the candidates we examined in reporter gene assays, four support a hypothesis that alleles that increase *MAP3K1* expression also increase breast cancer risk. Currently, the allelic effects of a fifth candidate, iCHAV2b SNP rs62355881, might be inconsistent with this hypothesis given that the conditional analysis suggests that iCHAV2b has a protective effect. However, we do not have clear epidemiological evidence that iCHAV2b has an individual effect on risk: iCHAV2b was only observed in the presence of iCHAV1, which acted in combination on the same haplotype to increase breast cancer risk, and we could not test such iCHAV haplotype effects in reporter gene assays given the number of candidates and the size of the region they encompass.

Consistent with our hypothesis that candidate causal risk alleles act by increasing transcriptional activation of *MAP3K1*, Godde et al. have recently demonstrated that up-regulation of MAP kinase activity in mouse mammary basal progenitor cells is associated with ductal hyperplasia and accelerated tumor progression.<sup>28</sup> This hypothesis is also supported by one known function of MEKK1: knock-down of *MAP3K1* in human breast cancer cells reduces tumor invasiveness and progression in a mouse model.<sup>29</sup> Furthermore, studies have shown that MEKK1 has an anti-apoptotic effect and enhances cancer cell survival,<sup>30,31</sup> although upon stress stimulus, caspase cleavage of the protein generates a fragment that plays a proapoptotic role.<sup>6,7</sup> These dual functions of MEKK1 suggest that it has a

complex role in cell-fate decisions. In this context, it is intriguing that somatic *MAP3K1* driver mutations, found in tumor sequencing studies, are mostly truncating and are predicted to disrupt MEKK1 signaling,<sup>11</sup> given that inactivation of the kinase domain at the protein terminus reduces apoptotic responses in cells exposed to stress.<sup>7</sup> Thus, it appears that germline cancer risk alleles act by increasing *MAP3K1* expression, but once a tumor has developed, somatic mutations drive cancer progression by disrupting MEKK1 signaling within the tumor. Dysregulation of *MAP3K1* expression or MEKK1 function might thus promote tumorigenesis by perturbing a balance between cell apoptosis and survival. Similar conflicting effects of germline risk variants and somatic mutations have been observed at other breast cancer risk loci. For example, *CCND1* is frequently amplified in breast tumors, and here, overexpression appears to play an important role in breast cancer pathogenesis,<sup>32</sup> even though germline breast cancer risk alleles at 11q13 reduce *CCND1* transcriptional activity.<sup>17</sup> Amplification of *TERT* (MIM 187270) is also common within breast and other tumors,<sup>33</sup> but again, germline breast cancer risk alleles reduce *TERT* transcriptional activity.<sup>34</sup> These observations therefore challenge the notion that variants at loci such as 5q11.2 act in the same manner as somatic tumor driver mutations to confer germline risk of tumor development.

iCHAV1 spans multiple PREs (PRE-A, PRE-B, and PRE-C) and is consistent with a recent proposal that genetic susceptibility to common diseases can be explained by multiple enhancer variants that are in linkage disequilibrium, that each have modest effects on gene expression, and that cooperatively act to alter gene expression.<sup>27</sup> There is also some suggestion from the haplotype data that iCHAV2a, which is in linkage disequilibrium ( $r^2 = 0.19$ – $0.29$ ) with iCHAV1, might have a cooperative effect on risk in combination with iCHAV1. The modest effect sizes observed in the reporter assays for iCHAV1 and iCHAV2a variants might be a consequence of the fact that, as a result of size limitations of reporter gene constructs, we could not examine these variants in combination.

Some SNP effects in our reporter assays were suggestive of cell-line and stimulus dependence, highlighting the importance of cellular and environmental context in the assessment of SNP functionality.<sup>23</sup> Similarly, we defined our PREs on the basis of chromatin modification and conformation states, both of which can change during development or in response to stimulus. Additionally, the effects of some SNPs might not have been observed because plasmid reporter gene constructs do not reflect the native genomic context or the chromatin or methylation state of genomic DNA. The chromatin state of transiently transfected DNA, for example, is considered to be more open and disorganized than the corresponding chromatin in the native genomic context and might not have the repressive chromatin structures, found in genomic DNA, that inhibit binding of ubiquitous transcription factors.<sup>35</sup> A disorganized chromatin state might explain the

inconsistent effect of rs17432750 in the PRE-B3 constructs (Figure 4A). The abrogation of the effect of rs17432750 in the haplotype construct suggests some interaction or cooperative effect of the minor alleles of rs17432750 and rs11956804 to enhance promoter activity. This effect might be possible as a result of the more open and permissive chromatin structures associated with transfected plasmid DNA.

It is noteworthy that, in available normal breast tissue, the top candidate causal variants showed no association with *MAP3K1* expression, although iCHAV2c variants were associated with significant differences in *SETD9* mRNA levels. Similarly, normal-breast-tissue-eQTL studies with strong candidate causal variants at the 11q13,<sup>17</sup> 10q26,<sup>15</sup> 2q35,<sup>36</sup> and 5p15.33<sup>34</sup> breast cancer risk loci have indicated that available normal breast samples might be inappropriate for these studies. Sample sizes are large enough for detecting significant eQTLs at these loci, but those detected do not appear to drive breast cancer risk. It is possible that tissue-heterogeneity-, developmental-stage-, or stimulus-dependent effects prevent the detection of risk-driving eQTLs in currently available normal breast samples. Indeed, the finding that upregulation of MAP kinase activity in mammary progenitor cells is associated with mammary tumorigenesis<sup>28</sup> suggests that increased *MAP3K1* expression in specific breast cell populations, possibly at a specific point in time, could drive breast cancer risk.

Studies on transcription factor binding indicate that the C (risk) allele of rs17432750 preferentially binds GATA3 over the A (protective) allele. Increased binding of the C allele by GATA3 appears to explain the activity of the PRE-B3 enhancer in which it is located (Figure 4E). These findings suggest that SNP rs17432750 is a strong causal candidate for the protective effect of iCHAV3. The transcription factor GATA3 has multiple regulatory roles and can affect histone modifications associated with enhancers and the binding of other breast-cancer-related transcription factors, such as ER- $\alpha$  and FOXA1.<sup>37</sup> We have previously identified GATA3 to be a mediator of breast cancer risk across multiple loci,<sup>38</sup> specifically at the 11q13 locus.<sup>17</sup>

In conclusion, we have found evidence of the existence of at least three breast cancer risk iCHAVs that partially coincide with four *MAP3K1* regulatory elements at 5q11.2. Genetic epidemiological studies within BCAC reduced the catalog of potentially causal variants from 909 to 193 candidates within five iCHAVs, of which at least three must be functional. Functional studies on candidates that lie within the identified regulatory elements have shown that the effects of strong candidate cancer risk alleles in iCHAV1, iCHAV2a, and iCHAV3 are compatible with the hypothesis that they act via increased expression of *MAP3K1*. Moreover, the function of MEKK1 suggests that increased expression might alter the balance between apoptosis and cell survival in breast cancer cells, thus explaining the risks conferred by the candidate alleles.

## Supplemental Data

Supplemental Data include Supplemental Acknowledgments, nine figures, and eight tables and can be found with this article online at <http://dx.doi.org/10.1016/j.ajhg.2014.11.009>.

Received: July 9, 2014

Accepted: November 17, 2014

Published: December 18, 2014

## Web Resources

The URLs for data presented herein are as follows:

1000 Genomes, <http://www.1000genomes.org/>

Online Mendelian Inheritance in Man (OMIM), <http://www.omim.org>

R package, <http://www.bios.unc.edu/~weisun/software/eMap>

UCSC Genome Browser, <http://genome.ucsc.edu>

## References

1. Easton, D.F., Pooley, K.A., Dunning, A.M., Pharoah, P.D., Thompson, D., Ballinger, D.G., Struwing, J.P., Morrison, J., Field, H., Luben, R., et al.; SEARCH collaborators; kConFab; AOCs Management Group (2007). Genome-wide association study identifies novel breast cancer susceptibility loci. *Nature* **447**, 1087–1093.
2. Michailidou, K., Hall, P., Gonzalez-Neira, A., Ghoussaini, M., Dennis, J., Milne, R.L., Schmidt, M.K., Chang-Claude, J., Bojesen, S.E., Bolla, M.K., et al.; Breast and Ovarian Cancer Susceptibility Collaboration; Hereditary Breast and Ovarian Cancer Research Group Netherlands (HEBON); kConFab Investigators; Australian Ovarian Cancer Study Group; GENICA (Gene Environment Interaction and Breast Cancer in Germany) Network (2013). Large-scale genotyping identifies 41 new loci associated with breast cancer risk. *Nat. Genet.* **45**, 353–361, e1–e2.
3. Broeks, A., Schmidt, M.K., Sherman, M.E., Couch, F.J., Hopper, J.L., Dite, G.S., Apicella, C., Smith, L.D., Hammet, F., Southey, M.C., et al.; Genica Network; kConFab; AOCs (2011). Low penetrance breast cancer susceptibility loci are associated with specific breast tumor subtypes: findings from the Breast Cancer Association Consortium. *Hum. Mol. Genet.* **20**, 3289–3303.
4. Antoniou, A.C., Spurdle, A.B., Sinilnikova, O.M., Healey, S., Pooley, K.A., Schmutzler, R.K., Versmold, B., Engel, C., Meindl, A., Arnold, N., et al.; Kathleen Cuninghame Consortium for Research into Familial Breast Cancer; OCGN; Swedish BRCA1 and BRCA2 study collaborators; DNA-HEBON collaborators; EMBRACE; GEMO; CIMBA (2008). Common breast cancer-predisposition alleles are associated with breast cancer risk in BRCA1 and BRCA2 mutation carriers. *Am. J. Hum. Genet.* **82**, 937–948.
5. Keshet, Y., and Seger, R. (2010). The MAP kinase signaling cascades: a system of hundreds of components regulates a diverse array of physiological functions. *Methods Mol. Biol.* **661**, 3–38.
6. Schlesinger, T.K., Bonvin, C., Jarpe, M.B., Fanger, G.R., Cardinaux, J.R., Johnson, G.L., and Widmann, C. (2002). Apoptosis stimulated by the 91-kDa caspase cleavage MEKK1 fragment requires translocation to soluble cellular compartments. *J. Biol. Chem.* **277**, 10283–10291.
7. Widmann, C., Gerwins, P., Johnson, N.L., Jarpe, M.B., and Johnson, G.L. (1998). MEK kinase 1, a substrate for DEVD-directed caspases, is involved in genotoxin-induced apoptosis. *Mol. Cell. Biol.* **18**, 2416–2429.
8. Alarcon-Vargas, D., Tansey, W.P., and Ronai, Z. (2002). Regulation of c-myc stability by selective stress conditions and by MEKK1 requires aa 127–189 of c-myc. *Oncogene* **21**, 4384–4391.
9. Fuchs, S.Y., Adler, V., Pincus, M.R., and Ronai, Z. (1998). MEKK1/JNK signaling stabilizes and activates p53. *Proc. Natl. Acad. Sci. USA* **95**, 10541–10546.
10. Clarke, N., Arenzana, N., Hai, T., Minden, A., and Prywes, R. (1998). Epidermal growth factor induction of the c-jun promoter by a Rac pathway. *Mol. Cell. Biol.* **18**, 1065–1073.
11. Stephens, P.J., Tarpey, P.S., Davies, H., Van Loo, P., Greenman, C., Wedge, D.C., Nik-Zainal, S., Martin, S., Varela, I., Bignell, G.R., et al.; Oslo Breast Cancer Consortium (OSBREAC) (2012). The landscape of cancer genes and mutational processes in breast cancer. *Nature* **486**, 400–404.
12. Nordgard, S.H., Johansen, F.E., Alnaes, G.I., Naume, B., Børresen-Dale, A.L., and Kristensen, V.N. (2007). Genes harbouring susceptibility SNPs are differentially expressed in the breast cancer subtypes. *Breast Cancer Res.* **9**, 113.
13. Abecasis, G.R., Altshuler, D., Auton, A., Brooks, L.D., Durbin, R.M., Gibbs, R.A., Hurles, M.E., and McVean, G.A.; 1000 Genomes Project Consortium (2010). A map of human genome variation from population-scale sequencing. *Nature* **467**, 1061–1073.
14. Abecasis, G.R., Auton, A., Brooks, L.D., DePristo, M.A., Durbin, R.M., Handsaker, R.E., Kang, H.M., Marth, G.T., and McVean, G.A.; 1000 Genomes Project Consortium (2012). An integrated map of genetic variation from 1,092 human genomes. *Nature* **491**, 56–65.
15. Meyer, K.B., O'Reilly, M., Michailidou, K., Carlebur, S., Edwards, S.L., French, J.D., Prathalingham, R., Dennis, J., Bolla, M.K., Wang, Q., et al.; GENICA Network; kConFab Investigators; Australian Ovarian Cancer Study Group (2013). Fine-scale mapping of the FGFR2 breast cancer risk locus: putative functional variants differentially bind FOXA1 and E2F1. *Am. J. Hum. Genet.* **93**, 1046–1060.
16. Tan-Wong, S.M., French, J.D., Proudfoot, N.J., and Brown, M.A. (2008). Dynamic interactions between the promoter and terminator regions of the mammalian BRCA1 gene. *Proc. Natl. Acad. Sci. USA* **105**, 5160–5165.
17. French, J.D., Ghoussaini, M., Edwards, S.L., Meyer, K.B., Michailidou, K., Ahmed, S., Khan, S., Maranian, M.J., O'Reilly, M., Hillman, K.M., et al.; GENICA Network; kConFab Investigators (2013). Functional variants at the 11q13 risk locus for breast cancer regulate cyclin D1 expression through long-range enhancers. *Am. J. Hum. Genet.* **92**, 489–503.
18. Prall, O.W., Sarcevic, B., Musgrove, E.A., Watts, C.K., and Sutherland, R.L. (1997). Estrogen-induced activation of Cdk4 and Cdk2 during G1-S phase progression is accompanied by increased cyclin D1 expression and decreased cyclin-dependent kinase inhibitor association with cyclin E-Cdk2. *J. Biol. Chem.* **272**, 10882–10894.
19. Schmidt, D., Wilson, M.D., Spyrou, C., Brown, G.D., Hadfield, J., and Odom, D.T. (2009). ChIP-seq: using high-throughput sequencing to discover protein-DNA interactions. *Methods* **48**, 240–248.
20. Curtis, C., Shah, S.P., Chin, S.F., Turashvili, G., Rueda, O.M., Dunning, M.J., Speed, D., Lynch, A.G., Samarajiwa, S., Yuan,

- Y., et al.; METABRIC Group (2012). The genomic and transcriptomic architecture of 2,000 breast tumours reveals novel subgroups. *Nature* 486, 346–352.
21. Cancer Genome Atlas Network (2012). Comprehensive molecular portraits of human breast tumours. *Nature* 490, 61–70.
  22. Marchini, J., and Howie, B. (2010). Genotype imputation for genome-wide association studies. *Nat. Rev. Genet.* 11, 499–511.
  23. Edwards, S.L., Beesley, J., French, J.D., and Dunning, A.M. (2013). Beyond GWAS: illuminating the dark road from association to function. *Am. J. Hum. Genet.* 93, 779–797.
  24. Li, G., Ruan, X., Auerbach, R.K., Sandhu, K.S., Zheng, M., Wang, P., Poh, H.M., Goh, Y., Lim, J., Zhang, J., et al. (2012). Extensive promoter-centered chromatin interactions provide a topological basis for transcription regulation. *Cell* 148, 84–98.
  25. Fullwood, M.J., Liu, M.H., Pan, Y.F., Liu, J., Xu, H., Mohamed, Y.B., Orlov, Y.L., Velkov, S., Ho, A., Mei, P.H., et al. (2009). An oestrogen-receptor-alpha-bound human chromatin interactome. *Nature* 462, 58–64.
  26. denDekker, A.D., Xu, X., Vaughn, M.D., Puckett, A.H., Gardner, L.L., Lambring, C.J., Deschenes, L., and Samuelson, D.J. (2012). Rat Mcs1b is concordant to the genome-wide association-identified breast cancer risk locus at human 5q11.2 and MIER3 is a candidate cancer susceptibility gene. *Cancer Res.* 72, 6002–6012.
  27. Corradin, O., Saiakhova, A., Akhtar-Zaidi, B., Myeroff, L., Willis, J., Cowper-Salari, R., Lupien, M., Markowitz, S., and Scahneri, P.C. (2014). Combinatorial effects of multiple enhancer variants in linkage disequilibrium dictate levels of gene expression to confer susceptibility to common traits. *Genome Res.* 24, 1–13.
  28. Godde, N.J., Sheridan, J.M., Smith, L.K., Pearson, H.B., Britt, K.L., Galea, R.C., Yates, L.L., Visvader, J.E., and Humbert, P.O. (2014). Scribble modulates the MAPK/Fra1 pathway to disrupt luminal and ductal integrity and suppress tumour formation in the mammary gland. *PLoS Genet.* 10, e1004323.
  29. Cuevas, B.D., Winter-Vann, A.M., Johnson, N.L., and Johnson, G.L. (2006). MEKK1 controls matrix degradation and tumor cell dissemination during metastasis of polyoma middle-T driven mammary cancer. *Oncogene* 25, 4998–5010.
  30. Hirano, T., Shino, Y., Saito, T., Komoda, F., Okutomi, Y., Takeda, A., Ishihara, T., Yamaguchi, T., Saisho, H., and Shirasawa, H. (2002). Dominant negative MEKK1 inhibits survival of pancreatic cancer cells. *Oncogene* 21, 5923–5928.
  31. Nawata, R., Yujiri, T., Nakamura, Y., Ariyoshi, K., Takahashi, T., Sato, Y., Oka, Y., and Tanizawa, Y. (2003). MEK kinase 1 mediates the antiapoptotic effect of the Bcr-Abl oncogene through NF-kappaB activation. *Oncogene* 22, 7774–7780.
  32. Arnold, A., and Papanikolaou, A. (2005). Cyclin D1 in breast cancer pathogenesis. *J. Clin. Oncol.* 23, 4215–4224.
  33. Cao, Y., Bryan, T.M., and Reddel, R.R. (2008). Increased copy number of the TERT and TERC telomerase subunit genes in cancer cells. *Cancer Sci.* 99, 1092–1099.
  34. Bojesen, S.E., Pooley, K.A., Johnatty, S.E., Beesley, J., Michailidou, K., Tyrer, J.P., Edwards, S.L., Pickett, H.A., Shen, H.C., Smart, C.E., et al.; Australian Cancer Study; Australian Ovarian Cancer Study; Kathleen Cuninghame Foundation Consortium for Research into Familial Breast Cancer (kConFab); Gene Environment Interaction and Breast Cancer (GENICA); Swedish Breast Cancer Study (SWE-BRCA); Hereditary Breast and Ovarian Cancer Research Group Netherlands (HEBON); Epidemiological study of BRCA1 & BRCA2 Mutation Carriers (EMBRACE); Genetic Modifiers of Cancer Risk in BRCA1/2 Mutation Carriers (GEMO) (2013). Multiple independent variants at the TERT locus are associated with telomere length and risks of breast and ovarian cancer. *Nat. Genet.* 45, 371–384, e1–e2.
  35. Smith, C.L., and Hager, G.L. (1997). Transcriptional regulation of mammalian genes in vivo. A tale of two templates. *J. Biol. Chem.* 272, 27493–27496.
  36. Ghossaini, M., Edwards, S.L., Michailidou, K., Nord, S., Cowper-Salari, R., Desai, K., Kar, S., Hillman, K.M., Kaufmann, S., Glubb, D.M., et al.; Australian Ovarian Cancer Management Group; Australian Ovarian Cancer Management Group (2014). Evidence that breast cancer risk at the 2q35 locus is mediated through IGFBP5 regulation. *Nat. Commun.* 4, 4999.
  37. Theodorou, V., Stark, R., Menon, S., and Carroll, J.S. (2013). GATA3 acts upstream of FOXA1 in mediating ESR1 binding by shaping enhancer accessibility. *Genome Res.* 23, 12–22.
  38. Fletcher, M.N.C., Castro, M.A.A., Wang, X., de Santiago, I., O'Reilly, M., Chin, S.-F., Rueda, O.M., Caldas, C., Ponder, B.A.J., Markowitz, F., and Meyer, K.B. (2013). Master regulators of FGFR2 signalling and breast cancer risk. *Nat. Commun.* 4, 2464.



## **Fine-Scale Mapping of the 5q11.2**

### **Breast Cancer Locus Reveals at Least Three**

### **Independent Risk Variants Regulating *MAP3K1***

Dylan M. Glubb, Mel J. Maranian, Kyriaki Michailidou, Karen A. Pooley, Kerstin B. Meyer, Siddhartha Kar, Saskia Carlebur, Martin O'Reilly, Joshua A. Betts, Kristine M. Hillman, Susanne Kaufmann, Jonathan Beesley, Sander Canisius, John L. Hopper, Melissa C. Southey, Helen Tsimiklis, Carmel Apicella, Marjanka K. Schmidt, Annegien Broeks, Frans B. Hogervorst, C. Ellen van der Schoot, Kenneth Muir, Artitaya Lophatananon, Sarah Stewart-Brown, Pornthep Siriwanarangsarn, Peter A. Fasching, Matthias Ruebner, Arif B. Ekici, Matthias W. Beckmann, Julian Peto, Isabel dos-Santos-Silva, Olivia Fletcher, Nichola Johnson, Paul D.P. Pharoah, Manjeet K. Bolla, Qin Wang, Joe Dennis, Elinor J. Sawyer, Ian Tomlinson, Michael J. Kerin, Nicola Miller, Barbara Burwinkel, Frederik Marme, Rongxi Yang, Harald Surowy, Pascal Guénel, Thérèse Truong, Florence Menegaux, Marie Sanchez, Stig E. Bojesen, Børge G. Nordestgaard, Sune F. Nielsen, Henrik Flyger, Anna González-Neira, Javier Benitez, M. Pilar Zamora, Jose Ignacio Arias Perez, Hoda Anton-Culver, Susan L. Neuhausen, Hermann Brenner, Aida Karina Dieffenbach, Volker Arndt, Christa Stegmaier, Alfons Meindl, Rita K. Schmutzler, Hiltrud Brauch, Yon-Dschun Ko, Thomas Brüning, The GENICA Network, Heli Nevanlinna, Taru A. Muranen, Kristiina Aittomäki, Carl Blomqvist, Keitaro Matsuo, Hidemi Ito, Hiroji Iwata, Hideo Tanaka, Thilo Dörk, Natalia V. Bogdanova, Sonja Helbig, Annika Lindblom, Sara Margolin, Arto Mannermaa, Vesa Kataja, Veli-Matti Kosma, Jaana M. Hartikainen, kConFab Investigators, Anna H. Wu, Chiu-chen Tseng, David Van Den Berg, Daniel O. Stram, Diether Lambrechts, Hui Zhao, Caroline Weltens, Erik van Limbergen, Jenny Chang-Claude, Dieter Flesch-Janys, Anja Rudolph, Petra Seibold, Paolo Radice, Paolo Peterlongo, Monica Barile, Fabio Capra, Fergus J. Couch, Janet E. Olson, Emily Hallberg, Celine Vachon, Graham G. Giles, Roger L. Milne, Catriona McLean, Christopher A. Haiman, Brian E. Henderson, Fredrick Schumacher, Loic Le Marchand, Jacques Simard, Mark S. Goldberg, France Labrèche, Martine Dumont, Soo Hwang Teo, Cheng Har Yip, Mee-Hoong See, Belinda Cornes, Ching-Yu Cheng, M. Kamran Ikram, Vessela Kristensen, NBCS, Wei Zheng, Sandra L. Halverson, Martha

Shrubsole, Jirong Long, Robert Winqvist, Katri Pylkäs, Arja Jukkola-Vuorinen, Saira Kauppila, Irene L. Andrulis, Julia A. Knight, Gord Glendon, Sandrine Tchatchou, Peter Devilee, Robert A.E.M. Tollenaar, Caroline Seynaeve, Christi J. Van Asperen, Montserrat García-Closas, Jonine Figueroa, Stephen J. Chanock, Jolanta Lissowska, Kamila Czene, Daniel Klevebring, Hatf Darabi, Mikael Eriksson, Maartje J. Hooning, Antoinette Hollestelle, John W.M. Martens, J. Margriet Collée, Per Hall, Jingmei Li, Keith Humphreys, Xiao-Ou Shu, Wei Lu, Yu-Tang Gao, Hui Cai, Angela Cox, Simon S. Cross, Malcolm W.R. Reed, William Blot, Lisa B. Signorello, Qiuyin Cai, Mitul Shah, Maya Ghousaini, Daehee Kang, Ji-Yeob Choi, Sue K. Park, Dong-Young Noh, Mikael Hartman, Hui Miao, Wei Yen Lim, Anthony Tang, Ute Hamann, Diana Torres, Anna Jakubowska, Jan Lubinski, Katarzyna Jaworska, Katarzyna Durda, Suleeporn Sangrajang, Valerie Gaborieau, Paul Brennan, James McKay, Curtis Olswold, Susan Slager, Amanda E. Toland, Drakoulis Yannoukakos, Chen-Yang Shen, Pei-Ei Wu, Jyh-Cherng Yu, Ming-Feng Hou, Anthony Swerdlow, Alan Ashworth, Nick Orr, Michael Jones, Guillermo Pita, M. Rosario Alonso, Nuria Álvarez, Daniel Herrero, Daniel C. Tessier, Daniel Vincent, Francois Bacot, Craig Luccarini, Caroline Baynes, Shahana Ahmed, Catherine S. Healey, Melissa A. Brown, Bruce A.J. Ponder, Georgia Chenevix-Trench, Deborah J. Thompson, Stacey L. Edwards, Douglas F. Easton, Alison M. Dunning, and Juliet D. French

## Supplemental Acknowledgments

Manuscript writing group: DMG, MJM, KM, KAP, KBM, AMD, JDF. Locus SNP selection: MG, ED, AMD. iCOGS genotyping, calling and QC: MJM, SEB, SFN, AG-N, MRA, DH, JB, DCT, DV, FB, FR, SA, CL, CB, DC, JC, JD, CSH, JS, AMD, GC-T, DFE. Imputation: KM, DFE. Statistical analyses and programming: KM, KAP, DB, ED, JT, SK, DFE. Functional analysis and bioinformatics: DMG, SLE, KBM, SC, MO, MJM JAB, KMH, SK, JB and JDF. COGS coordination: PH, DFE, JB, AMD, BCAC coordination: DFE, GC-T, PDP. BCAC data management: MKB, QW. All other authors provided participant samples and phenotype information, and read and approved the manuscript. BCAC thanks all the individuals who took part in these studies and all the researchers, clinicians, technicians and administrative staff who have enabled this work to be carried out. BCAC is funded by Cancer Research UK [C1287/A10118, C1287/A12014] and by the European Community's Seventh Framework Programme under grant agreement number 223175 (grant number HEALTH-F2-2009-223175) (COGS). Meetings of the BCAC have been funded by the European Union COST programme (BM0606). This study would not have been possible without the contributions of the following: Andrew Berchuck (OCAC), Rosalind A. Eeles, Ali Amin Al Olama, Zsofia Kote-Jarai, Sara Benlloch (PRACTICAL), Antonis Antoniou, Lesley McGuffog, and Ken Offit (CIMBA), Andrew Lee, Ed Dicks, and the staff of the Centre for Genetic Epidemiology Laboratory, the staff of the CNIO genotyping unit, Sylvie LaBoissière, Frederic Robidoux and the staff of the McGill University and Génome Québec Innovation Centre, the staff of the Copenhagen DNA laboratory, and Julie M. Cunningham, Sharon A. Windebank, Christopher A. Hilker, Jeffrey Meyer and the staff of Mayo Clinic Genotyping Core Facility. Genotyping of the iCOGS array was funded by the European Union (HEALTH-F2-2009-223175), Cancer Research UK (C1287/A10710 and C8197/A16565), the Canadian Institutes of Health Research for the "CIHR Team in Familial Risks of Breast Cancer" program - grant #CRN-87521, and the Ministry of Economic Development, Innovation and Export Trade of Quebec – grant # PSR-SIIRI-701. This study makes use of data generated by the Molecular Taxonomy of Breast Cancer International Consortium. Funding for the project was provided by Cancer Research UK and the British Columbia Cancer Agency Branch. The QIMR Berghofer group was supported by project grants from the National Health and Medical Research Council of Australia (1021731, 1058415). The work by KBM, MO, SC and BJAP is supported by Cancer Research UK and the Breast Cancer Research Foundation. DFE is a Principal Research Fellow of CR-UK. GCT is an NHMRC Senior Principal Research Fellow. SLE and JDF are supported by Fellowships from the National Breast Cancer Foundation (NBCF) Australia. The funders have no role in study design, data collection and analysis, decision to publish, or preparation of the manuscript.

### BCAC investigating groups:

The Australian Breast Cancer Family Study (ABCFS) would like to thank Maggie Angelakos, Judi Maskiell, Gillian Dite. ABCFS was supported by grant UM1 CA164920 from the National Cancer Institute (USA). The content of this manuscript does not necessarily reflect the views or policies of the National Cancer Institute or any of the collaborating centers in the Breast Cancer Family Registry (BCFR), nor does mention of trade names, commercial products, or organizations imply endorsement by the USA Government or the BCFR. The ABCFS was also supported by the National Health and Medical Research Council of Australia, the New South Wales Cancer Council, the Victorian Health Promotion Foundation (Australia) and the Victorian Breast Cancer Research Consortium. J.L.H. is a National Health and Medical Research Council (NHMRC) Australia Fellow and a Victorian Breast Cancer Research Consortium Group Leader. M.C.S. is a NHMRC Senior Research Fellow and a Victorian Breast Cancer Research Consortium Group Leader. The ABCS study would like to thank Sten Cornelissen, Richard van Hien, Linde Braaf, Senno Verhoef, Laura van 't Veer, Emiel Rutgers. The **ABCS** study was supported by the Dutch Cancer Society [grants NKI 2007-3839; 2009 4363]; BBMRI-NL, which is a Research Infrastructure financed by the Dutch government (NWO 184.021.007); and the Dutch National Genomics Initiative. The ACP study wishes to thank the

participants in the Thai Breast Cancer study. Special Thanks also go to the Thai Ministry of Public Health (MOPH), doctors and nurses who helped with the data collection process. Finally, the study would like to thank Dr Prat Boonyawongviroj, the former Permanent Secretary of MOPH and Dr Pornthep Siriwanarungsan, the Department Director-General of Disease Control who have supported the study throughout. The ACP study is funded by the Breast Cancer Research Trust, UK. The BBCC study would like to thank Matthias Rübner, Alexander Hein, Michael Schneider. The work of the BBCC was partly funded by ELAN-Fond of the University Hospital of Erlangen. The BBCCS would like to thank Eileen Williams, Elaine Ryder-Mills, Kara Sargus. The **BBCCS** is funded by Cancer Research UK and Breakthrough Breast Cancer and acknowledges NHS funding to the NIHR Biomedical Research Centre, and the National Cancer Research Network (NCRN). The BIGGS would like to thank Niall McInerney, Gabrielle Colleran, Andrew Rowan, Angela Jones. ES is supported by NIHR Comprehensive Biomedical Research Centre, Guy's & St. Thomas' NHS Foundation Trust in partnership with King's College London, United Kingdom. IT is supported by the Oxford Biomedical Research Centre. The BSUCH would like to thank Peter Bugert, Medical Faculty Mannheim. The BSUCH study was supported by the Dietmar-Hopp Foundation, the Helmholtz Society and the German Cancer Research Center (DKFZ). The CECILE study would like to thank Claire Mulot and Pierre Laurent-Puig (Biobank Saints-Pères Paris), Pierre Kerbrat (Centre Eugène Marquis, Rennes), Patrick Arveux (Centre Georges François Leclerc, Dijon) The **CECILE** study was funded by Fondation de France, Institut National du Cancer (INCa), Ligue Nationale contre le Cancer, Ligue contre le Cancer Grand Ouest, Agence Nationale de Sécurité Sanitaire (ANSES), Agence Nationale de la Recherche (ANR). The CGPS study would like to thank Staff and participants of the Copenhagen General Population Study. It would also like to thank Dorthe Uldall Andersen, Maria Birna Arnadottir, Anne Bank and Dorthe Kjeldgård Hansen for the excellent technical assistance. The Danish Breast Cancer Group (DBCG) is acknowledged for the tumor information. The CGPS was supported by the Chief Physician Johan Boserup and Lise Boserup Fund, the Danish Medical Research Council and Herlev Hospital. The CNIO-BCS would like to thank Guillermo Pita, Charo Alonso, Daniel Herrero, Nuria Álvarez, Pilar Zamora, Primitiva Menendez, the Human Genotyping-CEGEN Unit (CNIO). The CNIO-BCS was supported by the Genome Spain Foundation, the Red Temática de Investigación Cooperativa en Cáncer and grants from the Asociación Española Contra el Cáncer and the Fondo de Investigación Sanitario (PI11/00923 and PI081120). The Human Genotyping-CEGEN Unit (CNIO) is supported by the Instituto de Salud Carlos III. The CTS study would like to thank the CTS Steering Committee: Leslie Bernstein, Susan Neuhausen, James Lacey, Sophia Wang, Huiyan Ma, Yani Lu, Jessica Clague DeHart at the Beckman Research Institute of City of Hope, Dennis Deapen, Rich Pinder, Eunjung Lee, and Fred Schumacher at the University of Southern California, Pam Horn-Ross, Peggy Reynolds, Christina Clarke Dur and David Nelson at the Cancer Prevention Institute of California, and Hoda Anton-Culver, Argyrios Ziogas, and Hannah Park at the University of California Irvine.. The **CTS** was initially supported by the California Breast Cancer Act of 1993 and the California Breast Cancer Research Fund (contract 97-10500) and is currently funded through the National Institutes of Health (R01 CA77398). Collection of cancer incidence data was supported by the California Department of Public Health as part of the statewide cancer reporting program mandated by California Health and Safety Code Section 103885. HAC receives support from the Lon V Smith Foundation (LVS39420). The ESTHER study would like to thank Hartwig Ziegler, Sonja Wolf, Volker Hermann. The ESTHER study was supported by a grant from the Baden Württemberg Ministry of Science, Research and Arts. Additional cases were recruited in the context of the VERDI study, which was supported by a grant from the German Cancer Aid (Deutsche Krebshilfe). The GENICA Network would like to thank Dr. Margarete Fischer-Bosch-Institute of Clinical Pharmacology, Stuttgart, and University of Tübingen, Germany; [HB, Wing-Yee Lo, Christina Justenhoven], Department of Internal Medicine, Evangelische Kliniken Bonn gGmbH, Johanniter Krankenhaus, Bonn, Germany [YDK, Christian Baisch], Institute of Pathology, University of Bonn, Germany [Hans-Peter Fischer], Molecular Genetics of Breast Cancer, Deutsches Krebsforschungszentrum (DKFZ), Heidelberg, Germany [Ute Hamann], Institute for Prevention and Occupational Medicine of the German Social Accident Insurance, Institute of the Ruhr University Bochum (IPA), Bochum, Germany [TB, Beate Pesch, Sylvia Rabstein, Anne Lotz]; and Institute of Occupational Medicine and Maritime Medicine, University Medical Center Hamburg-Eppendorf, Germany [Volker Harth]. The **GENICA** was funded by the Federal Ministry of Education and Research (BMBF) Germany grants 01KW9975/5, 01KW9976/8, 01KW9977/0 and 01KW0114, the Robert Bosch Foundation,

Stuttgart, Deutsches Krebsforschungszentrum (DKFZ), Heidelberg, the Institute for Prevention and Occupational Medicine of the German Social Accident Insurance, Institute of the Ruhr University Bochum (IPA), Bochum, as well as the Department of Internal Medicine, Evangelische Kliniken Bonn gGmbH, Johanniter Krankenhaus, Bonn, Germany. The HEBCS would like to thank Kirsimari Aaltonen, Karl von Smitten, Sofia Khan, Tuomas Heikkinen, Irja Erkkilä. The HEBCS was financially supported by the Helsinki University Central Hospital Research Fund, Academy of Finland (266528), the Finnish Cancer Society, The Nordic Cancer Union and the Sigrid Juselius Foundation. The **HERPACC** was supported by a Grant-in-Aid for Scientific Research on Priority Areas from the Ministry of Education, Science, Sports, Culture and Technology of Japan, by a Grant-in-Aid for the Third Term Comprehensive 10-Year Strategy for Cancer Control from Ministry Health, Labour and Welfare of Japan, by Health and Labour Sciences Research Grants for Research on Applying Health Technology from Ministry Health, Labour and Welfare of Japan and by National Cancer Center Research and Development Fund. The HMBCS would like to thank Peter Hillemanns, Hans Christiansen and Johann H. Karstens. . The **HMBCS** was supported by a grant from the Friends of Hannover Medical School and by the Rudolf Bartling Foundation. Financial support for **KARBAC** was provided through the regional agreement on medical training and clinical research (ALF) between Stockholm County Council and Karolinska Institutet, the Swedish Cancer Society, The Gustav V Jubilee foundation and and Bert von Kantzows foundation. The KBCP would like to thank Eija Myöhänen, Helena Kemiläinen. The **KBCP** was financially supported by the special Government Funding (EVO) of Kuopio University Hospital grants, Cancer Fund of North Savo, the Finnish Cancer Organizations, and by the strategic funding of the University of Eastern Finland. The kConFab/AOCS study would like to thank Heather Thorne, Eveline Niedermayr, all the kConFab research nurses and staff, the heads and staff of the Family Cancer Clinics, and the Clinical Follow Up Study (which has received funding from the NHMRC, the National Breast Cancer Foundation, Cancer Australia, and the National Institute of Health (USA)) for their contributions to this resource, and the many families who contribute to kConFab. **kConFab** is supported by a grant from the National Breast Cancer Foundation, and previously by the National Health and Medical Research Council (NHMRC), the Queensland Cancer Fund, the Cancer Councils of New South Wales, Victoria, Tasmania and South Australia, and the Cancer Foundation of Western Australia. **LAABC** is supported by grants (1RB-0287, 3PB-0102, 5PB-0018, 10PB-0098) from the California Breast Cancer Research Program. Incident breast cancer cases were collected by the USC Cancer Surveillance Program (CSP) which is supported under subcontract by the California Department of Health. The CSP is also part of the National Cancer Institute's Division of Cancer Prevention and Control Surveillance, Epidemiology, and End Results Program, under contract number N01CN25403. The LMBC would like to thank Gilian Peuteman, Dominiek Smeets, Thomas Van Brussel and Kathleen Corthouts. LMBC is supported by the 'Stichting tegen Kanker' (232-2008 and 196-2010). Diether Lambrechts is supported by the FWO and the KULPFV/10/016-SymBioSysII. The MARIE study would like to Judith Heinz, Nadia Obi, Alina Vrieling, Sabine Behrens, Ursula Eilber, Muhabbet Celik, Til Olchers and Stefan Nickels. The **MARIE** study was supported by the Deutsche Krebshilfe e.V. [70-2892-BR I, 106332, 108253, 108419], the Hamburg Cancer Society, the German Cancer Research Center and the Federal Ministry of Education and Research (BMBF) Germany [01KH0402]. The MBCSG would like to thank Siranoush Manoukian, Bernard Peissel, Giulietta Scuvera and Daniela Zaffaroni of the Fondazione IRCCS Istituto Nazionale dei Tumori (INT); Bernardo Bonanni and Irene Feroce of the Istituto Europeo di Oncologia (IEO) and Loris Bernard and the personnel of the Cogentech Cancer Genetic Test Laboratory. **MBCSG** is supported by grants from the Italian Association for Cancer Research (AIRC) and by funds from the Italian citizens who allocated the 5/1000 share of their tax payment in support of the Fondazione IRCCS Istituto Nazionale Tumori, according to Italian laws (INT-Institutional strategic projects "5x1000"). The **MCBCS** was supported by the NIH grants CA128978, CA116167, CA176785 an NIH Specialized Program of Research Excellence (SPORE) in Breast Cancer [CA116201], and the Breast Cancer Research Foundation and a generous gift from the David F. and Margaret T. Grohne Family Foundation and the Ting Tsung and Wei Fong Chao Foundation. **MCCS** cohort recruitment in the was funded by VicHealth and Cancer Council Victoria. The MCCS was further supported by Australian NHMRC grants 209057, 251553 and 504711 and by infrastructure provided by Cancer Council Victoria. The MEC was support by NIH grants CA63464, CA54281, CA098758 and CA132839. The MTLGBCS would like to thank Martine Tranchant (CHU de Québec Research Center), Marie-France Valois, Annie Turgeon and Lea Heguy (McGill University Health Center, Royal Victoria Hospital; McGill

University) for DNA extraction, sample management and skillful technical assistance. J.S. is Chairholder of the Canada Research Chair in Oncogenetics. The work of **MTLGEBCS** was supported by the Quebec Breast Cancer Foundation, the Canadian Institutes of Health Research for the “CIHR Team in Familial Risks of Breast Cancer” program – grant # CRN-87521 and the Ministry of Economic Development, Innovation and Export Trade – grant # PSR-SIIRI-701. The **MYBRCA** study would like to thank Phuah Sze Yee, Peter Kang, Kang In Nee, Kavitta Sivanandan, Shivaani Mariapun, Yoon Sook-Yee, Daphne Lee, Teh Yew Ching and Nur Aishah Mohd Taib for DNA Extraction and patient recruitment. **MYBRCA** is funded by research grants from the Malaysian Ministry of Science, Technology and Innovation (MOSTI), Malaysian Ministry of Higher Education (UM.C/HIR/MOHE/06) and Cancer Research Initiatives Foundation (CARIF). Additional controls were recruited by the Singapore Eye Research Institute, which was supported by a grant from the Biomedical Research Council (BMRC08/1/35/19/550), Singapore and the National medical Research Council, Singapore (NMRC/CG/SERI/2010). The **NBCS** was supported by grants from the Norwegian Research council, 155218/V40, 175240/S10 to ALBD, FUGE-NFR 181600/V11 to VNK and a Swizz Bridge Award to ALBD. The **NBHS\_TN** study would like to thank participants and research staff for their contributions and commitment to this study. The **NBHS** was supported by NIH grant R01CA100374. Biological sample preparation was conducted the Survey and Biospecimen Shared Resource, which is supported by P30 CA68485. The **OBCS** study would like to thank Meeri Otsukka, Kari Mononen, Mervi Grip. The **OBCS** was supported by research grants from the Finnish Cancer Foundation, the Academy of Finland (grant number 250083, 122715 and Center of Excellence grant number 251314), the Finnish Cancer Foundation, the Sigrid Juselius Foundation, the University of Oulu, the University of Oulu Support Foundation and the special Governmental EVO funds for Oulu University Hospital-based research activities. The **OFBCR** study would like to thank Teresa Selander, Nayana Weerasooriya. The Ontario Familial Breast Cancer Registry (OFBCR) was supported by grant UM1 CA164920 from the National Cancer Institute (USA). The content of this manuscript does not necessarily reflect the views or policies of the National Cancer Institute or any of the collaborating centers in the Breast Cancer Family Registry (BCFR), nor does mention of trade names, commercial products, or organizations imply endorsement by the USA Government or the BCFR. The **ORIGO** study would like to thank E. Krol-Warmerdam, and J. Blom for patient accrual, administering questionnaires, and managing clinical information. The **LUMC** survival data were retrieved from the Leiden hospital-based cancer registry system (ONCDOC) with the help of Dr. J. Molenaar. The **ORIGO** study was supported by the Dutch Cancer Society (RUL 1997-1505) and the Biobanking and Biomolecular Resources Research Infrastructure (BBMRI-NL CP16). The **PBCS** study would like to thank Louise Brinton, Mark Sherman, Neonila Szeszenia-Dabrowska, Beata Peplonska, Witold Zatonski, Pei Chao, Michael Stagner. The **PBCS** was funded by Intramural Research Funds of the National Cancer Institute, Department of Health and Human Services, USA. The **pKARMA** study would like to thank The Swedish Medical Research Counsel. The **pKARMA** study was supported by Märit and Hans Rausings Initiative Against Breast Cancer. The **RBCS** study would like to thank Petra Bos, Jannet Blom, Ellen Crepin, Elisabeth Huijskens, Annette Heemskerk, the Erasmus MC Family Cancer Clinic. The **RBCS** was funded by the Dutch Cancer Society (DDHK 2004-3124, DDHK 2009-4318). The **SASBAC** would like to thank The Swedish Medical Research Counsel. The **SASBAC** study was supported by funding from the Agency for Science, Technology and Research of Singapore (A\*STAR), the US National Institute of Health (NIH) and the Susan G. Komen Breast Cancer Foundation. The **SBCGS** would like to thank participants and research staff for their contributions and commitment to this study. The **SBCGS** was supported primarily by NIH grants R01CA64277, R01CA148667, and R37CA70867. Biological sample preparation was conducted the Survey and Biospecimen Shared Resource, which is supported by P30 CA68485. The scientific development and funding of this project were, in part, supported by the Genetic Associations and Mechanisms in Oncology (GAME-ON) Network U19 CA148065. The **SBCS** would like to thank Sue Higham, Helen Cramp, Sabapathy Balasubramanian, Ian Borck and Dan Connley. The **SBCS** was supported by Yorkshire Cancer Research S295, S299, S305PA and Sheffield Exeprimental Cancer Medicine Centre. The **SCCS** is supported by a grant from the National Institutes of Health (R01 CA092447). Data on **SCCS** cancer cases used in this publication were provided by the Alabama Statewide Cancer Registry; Kentucky Cancer Registry, Lexington, KY; Tennessee Department of Health, Office of Cancer Surveillance; Florida Cancer Data System; North Carolina Central Cancer Registry, North Carolina Division of Public Health; Georgia Comprehensive Cancer Registry; Louisiana Tumor Registry; Mississippi Cancer Registry; South

Carolina Central Cancer Registry; Virginia Department of Health, Virginia Cancer Registry; Arkansas Department of Health, Cancer Registry, 4815 W. Markham, Little Rock, AR 72205. The Arkansas Central Cancer Registry is fully funded by a grant from National Program of Cancer Registries, Centers for Disease Control and Prevention (CDC). Data on SCCS cancer cases from Mississippi were collected by the Mississippi Cancer Registry which participates in the National Program of Cancer Registries (NPCR) of the Centers for Disease Control and Prevention (CDC). The contents of this publication are solely the responsibility of the authors and do not necessarily represent the official views of the CDC or the Mississippi Cancer Registry. The SEARCH study would like to thank The SEARCH and EPIC teams. **SEARCH** is funded by a programme grant from Cancer Research UK [C490/A10124] and supported by the UK National Institute for Health Research Biomedical Research Centre at the University of Cambridge. **SEBCS** was supported by the BRL (Basic Research Laboratory) program through the National Research Foundation of Korea funded by the Ministry of Education, Science and Technology (2012-0000347). **SGBCC** is funded by the National Medical Research Council start-up Grant and National University Cancer Institute Singapore (NCIS) Centre Grant. The study would like to thank the participants and research coordinator Kimberley Chua. Additional controls were recruited by the Singapore Consortium of Cohort Studies-Multi-ethnic cohort (SCCS-MEC), which was funded by the Biomedical Research Council, grant number: 05/1/21/19/425. The SKKDKFZS study thanks all study participants, clinicians, family doctors, researchers and technicians for their contributions and commitment to this study. SKKDKFZS is supported by the DKFZ. The SZBCS was supported by Grant PBZ\_KBN\_122/P05/2004. The TBCS was funded by The National Cancer Institute Thailand. The **TNBCC** was supported by: a Specialized Program of Research Excellence (SPORE) in Breast Cancer (CA116201), a grant from the Breast Cancer Research Foundation, a generous gift from the David F. and Margaret T. Grohne Family Foundation, the Stefanie Spielman Breast Cancer fund and the OSU Comprehensive Cancer Center, the Hellenic Cooperative Oncology Group research grant (HR R\_BG/04) and the Greek General Secretary for Research and Technology (GSRT) Program, Research Excellence II, the European Union (European Social Fund – ESF), and Greek national funds through the Operational Program "Education and Lifelong Learning" of the National Strategic Reference Framework (NSRF) - ARISTEIA. The **TWBCS** is supported by the Taiwan Biobank project of the Institute of Biomedical Sciences, Academia Sinica, Taiwan. The UKBGS study would like to thank Breakthrough Breast Cancer and the Institute of Cancer Research for support and funding of the Breakthrough Generations Study, and the study participants, study staff, and the doctors, nurses and other health care providers and health information sources who have contributed to the study. We acknowledge NHS funding to the Royal Marsden/ICR NIHR Biomedical Research Centre. The UKBGS is funded by Breakthrough Breast Cancer and the Institute of Cancer Research (ICR), London. ICR acknowledges NHS funding to the NIHR Biomedical Research Centre.

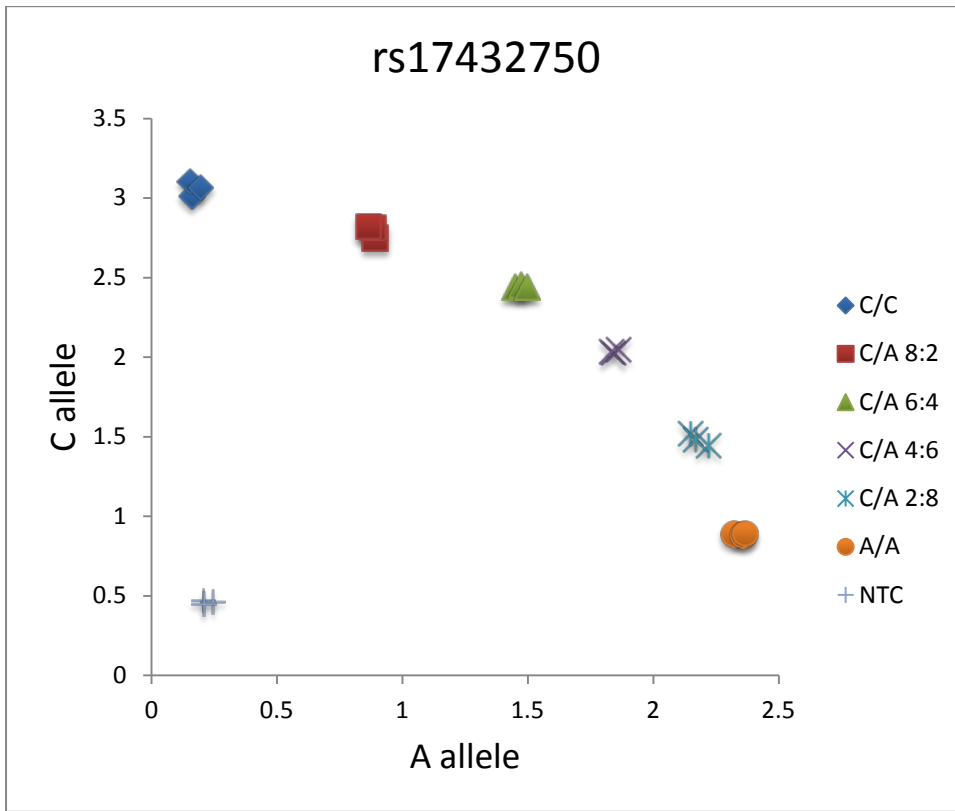

**Figure S1. Allelic Discrimination plot of known ratios of genomic DNA from breast cell lines carrying the C/C (ZR751) or A/A (MDA-MB-468) at rs17432750.**





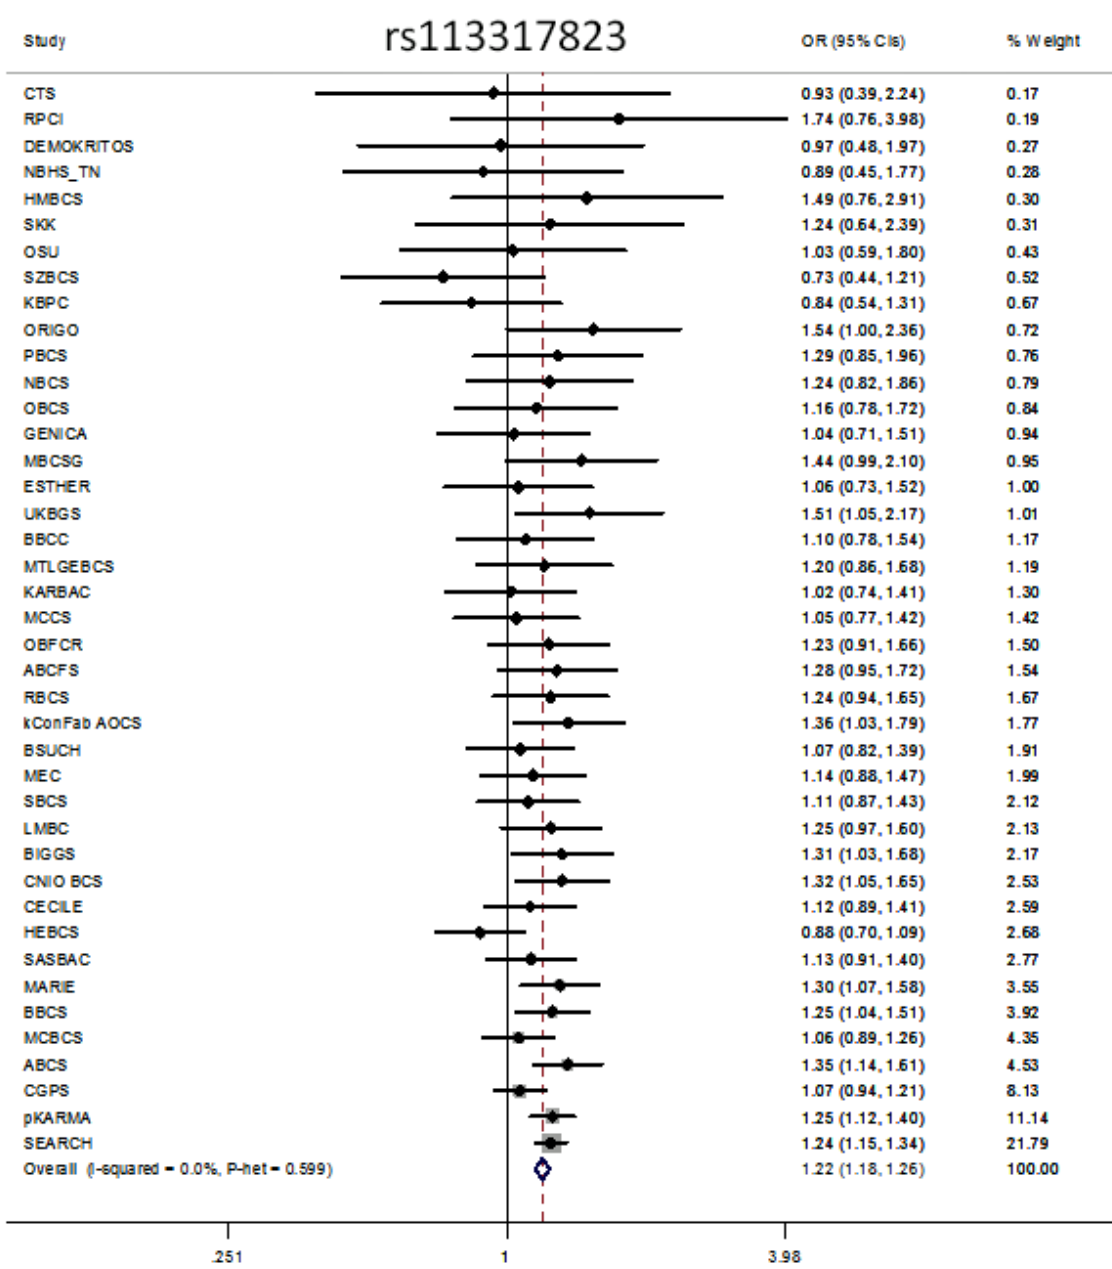

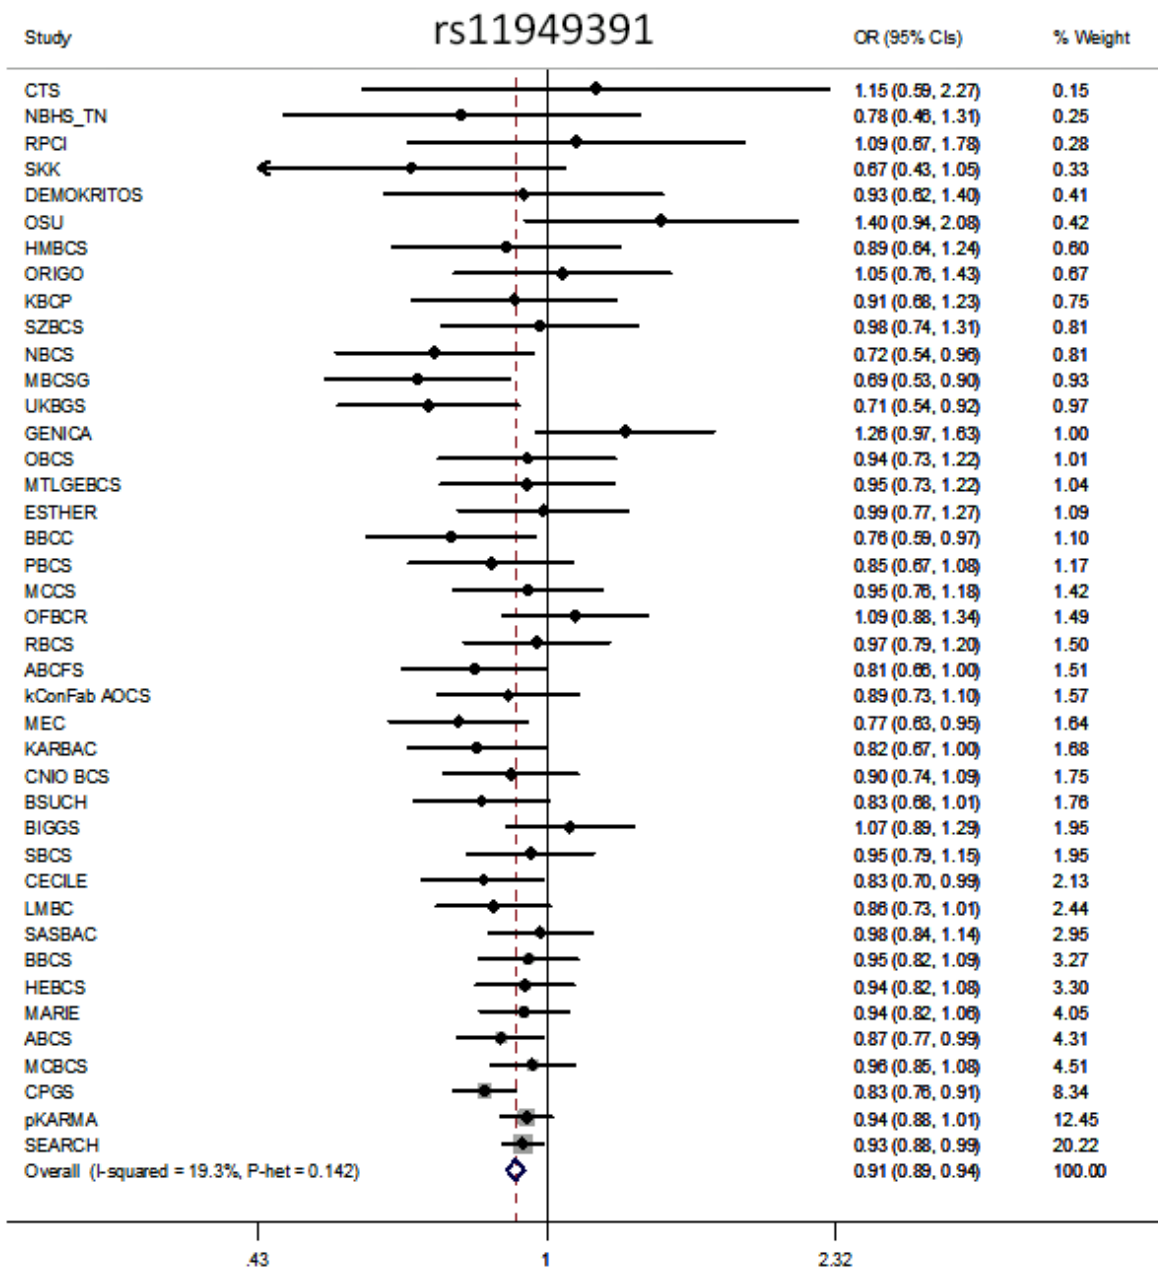

Figure S2. Forest plots for the three independently-associated SNPs marking iCHAVs 1-3.

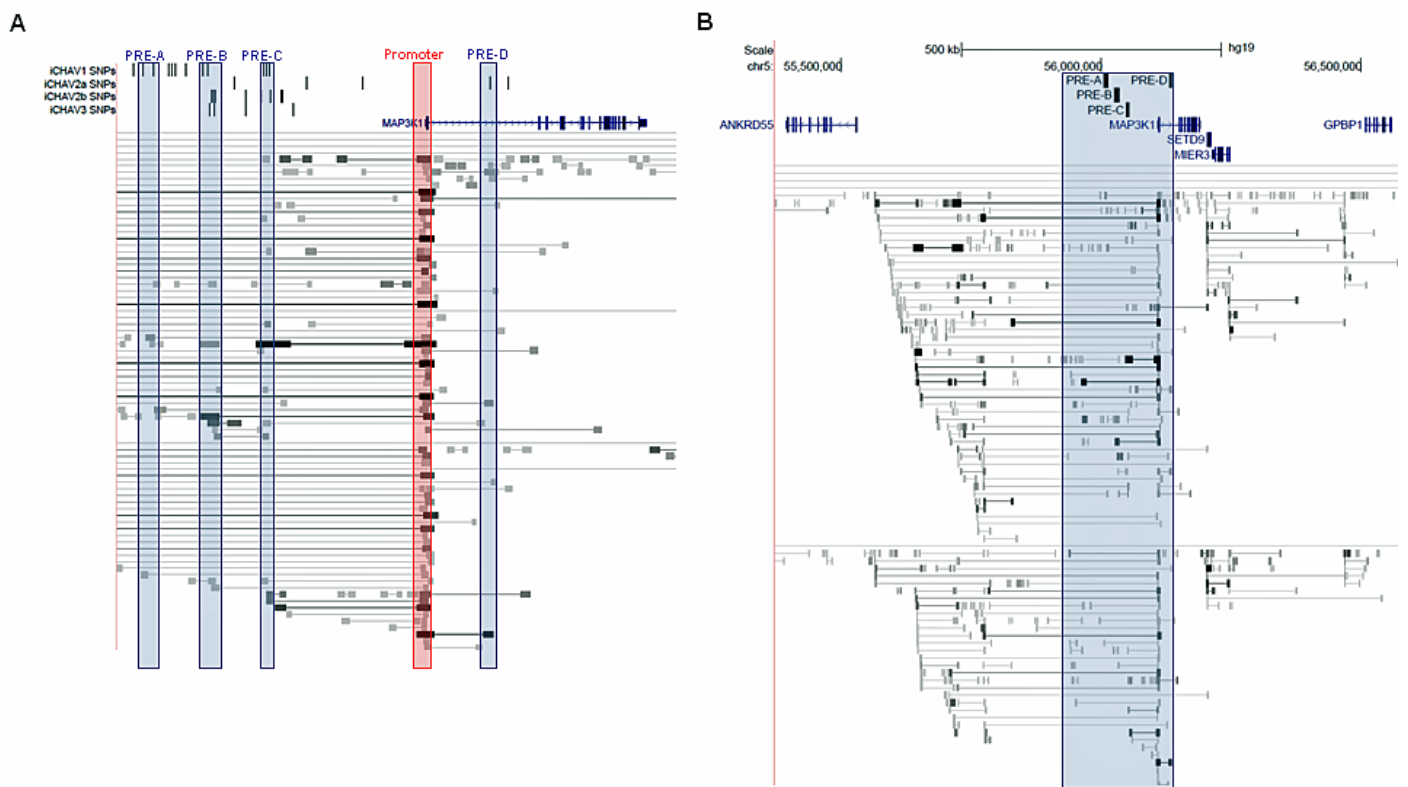

**Figure S3. RNA polymerase II ChIA-PET at the 5q11.2 breast cancer risk locus in MCF7 cells shows chromatin interactions between discrete genomic regions and the *MAP3K1* promoter.** ENCODE data (GEO sample accession GSM970209) was accessed using the UCSC genome browser. iCHAV variants and PREs are shown. Panel (A) shows the zoomed in region containing the PREs and *MAP3K1*. Panel (B) shows the 5q11.2 risk locus and flanking genes.

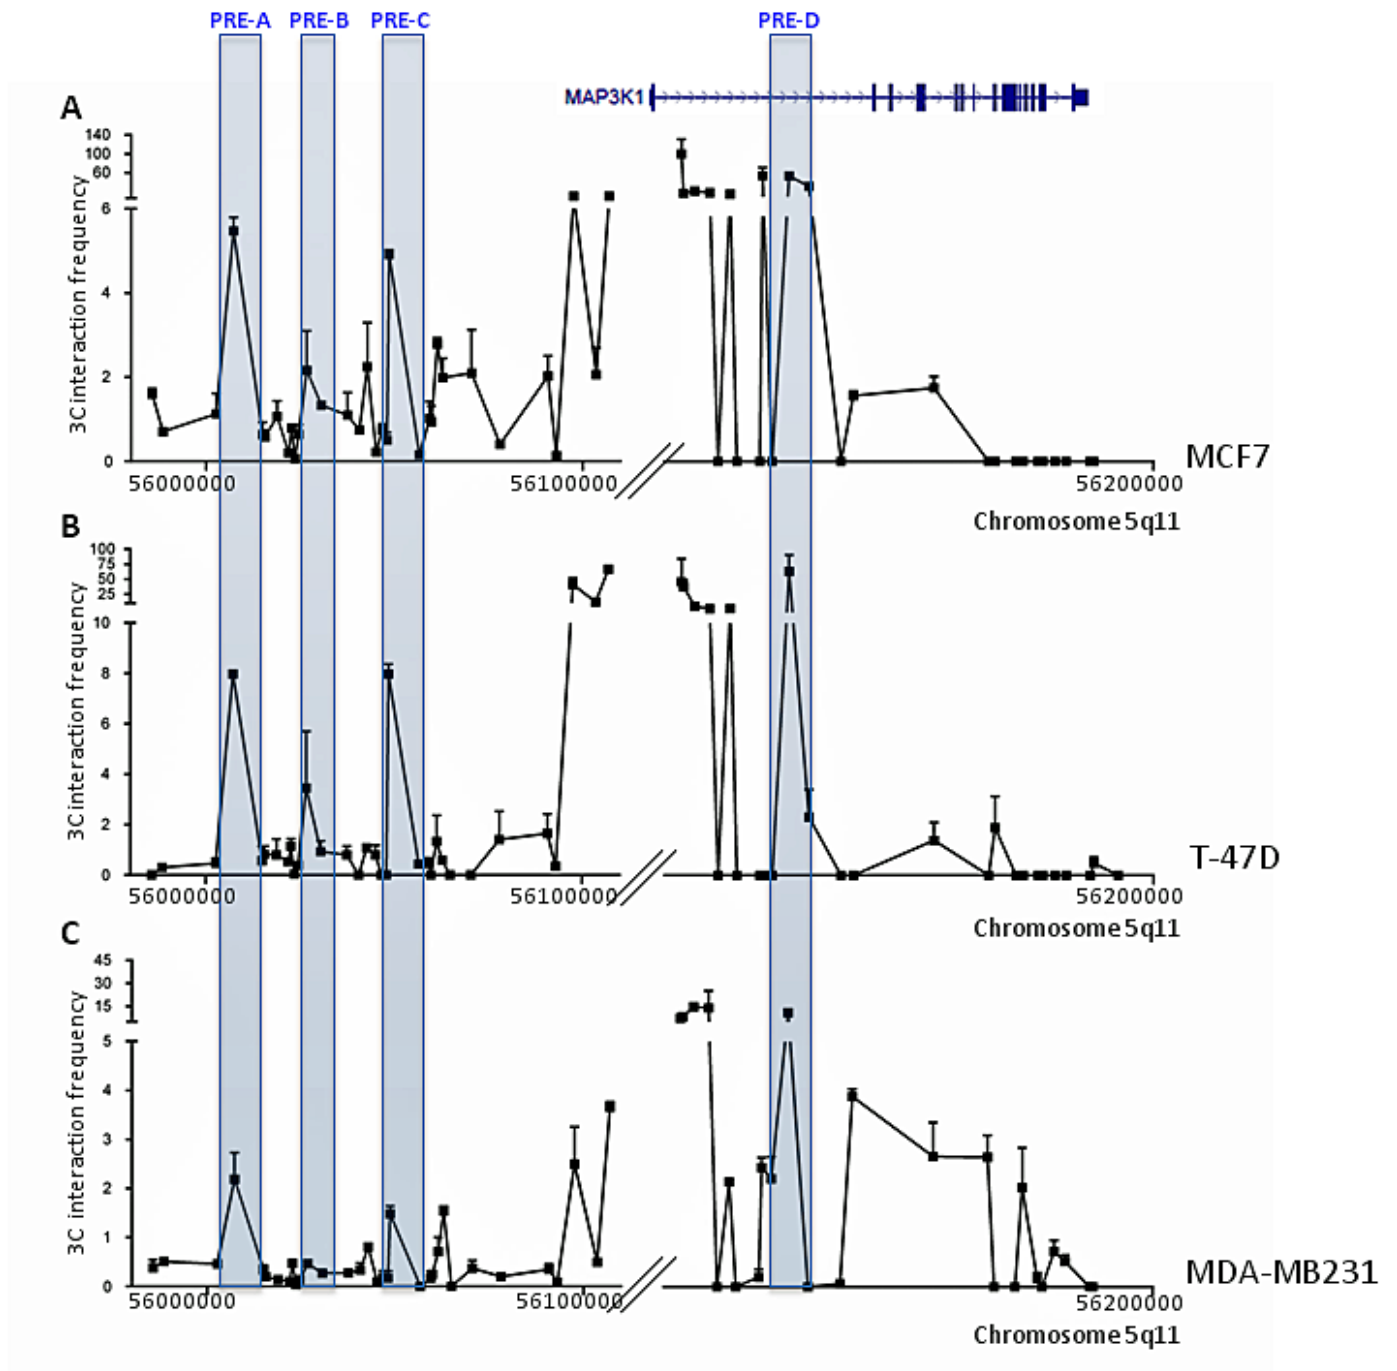

**Figure S4. Chromatin interactions with the *MAP3K1* promoter in breast cancer cell lines at the 5q11.2 risk locus.** 3C libraries were generated with EcoRI. Chromatin interaction frequencies were plotted at the chromosomal position of the corresponding EcoRI fragments for MCF7 (A), T-47D (B) and MDA-MB231 (C) libraries, respectively. PREs are highlighted at their chromosomal locations. A representative graph of at least two biological replicates is shown and error bars represent SD.

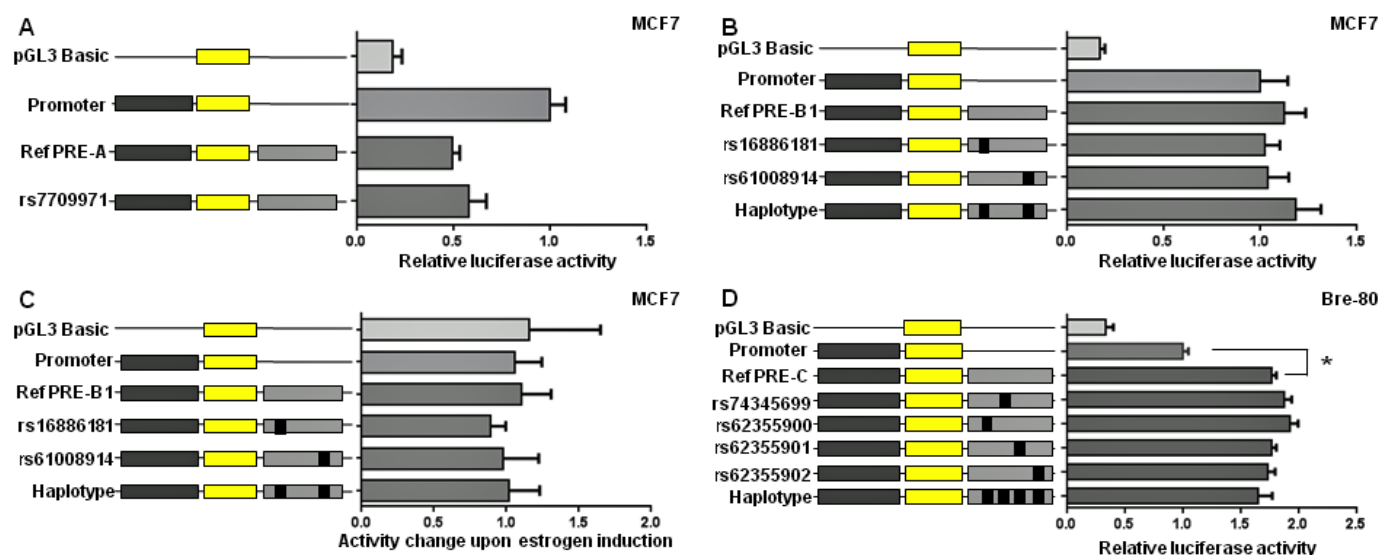

**Figure S5. Luciferase reporter assays of PRE constructs containing iCHAV1 SNPs.** MCF7 cells were transiently transfected with PRE-A (A) or PRE-B1 (B) and Bre-80 cells with PRE-C (D) constructs under basal conditions and assayed for luciferase activity after 24 h. Panel (C) shows results from luciferase assays after estrogen induction of MCF7 cells transfected with PRE-B1 constructs. For each reporter construct, the luciferase activity of estrogen treated cells was normalized to the activity of the corresponding vehicle treated cells. Error bars denote SEM from three experiments performed in triplicate. *P*-values were determined by repeated-measures ANOVA followed by Dunnett's multiple comparisons test (\**P*<0.05).

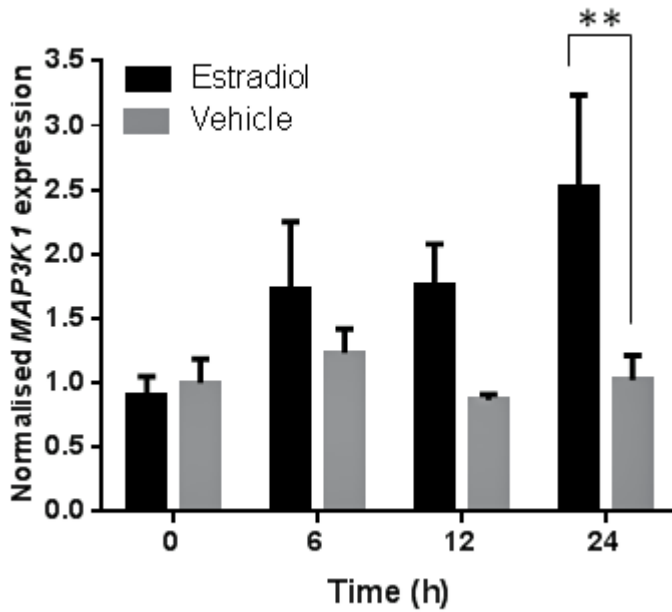

**Figure S6. *MAP3K1* expression is induced in MCF7 cells after estrogen treatment.** MCF7 cells were treated with either 100 nM estradiol or vehicle for 24 h. *MAP3K1* expression was measured at baseline and after 6, 12 and 24 h by qPCR and normalized using *GUS* expression as an internal control. Error bars denote SEM from three experiments performed in triplicate. Differences in expression between vehicle and estradiol treated cells were tested using a two-way repeated measures ANOVA followed by Sidak's multiple comparisons test (\*\* $P < 0.01$ ).

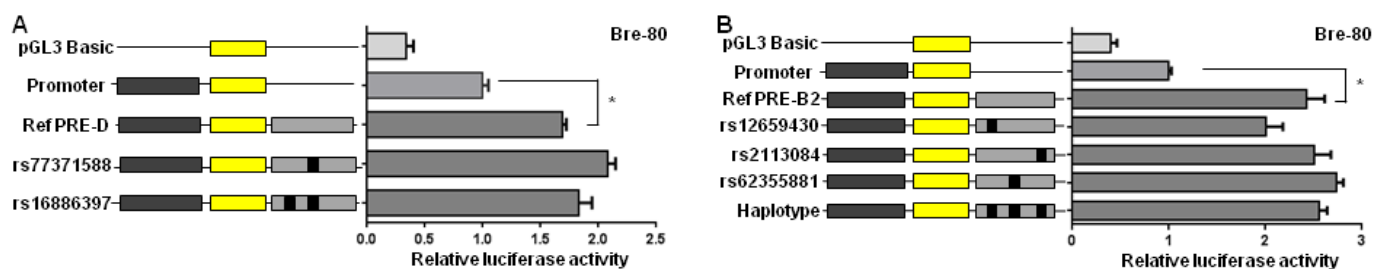

**Figure S7. Luciferase reporter assays of PRE-D constructs containing iCHAV2a SNPs and PRE-B2 constructs containing iCHAV2b variants in Bre-80 cells.** Bre-80 cells were transfected with PRE-D and PRE-B2 constructs. Cells were assayed for luciferase activity after 24 h. Error bars denote SEM from three experiments performed with triplicates. Statistical significance was determined by repeated-measures ANOVA followed by Dunnett's multiple comparisons test ( $*P<0.05$ ).



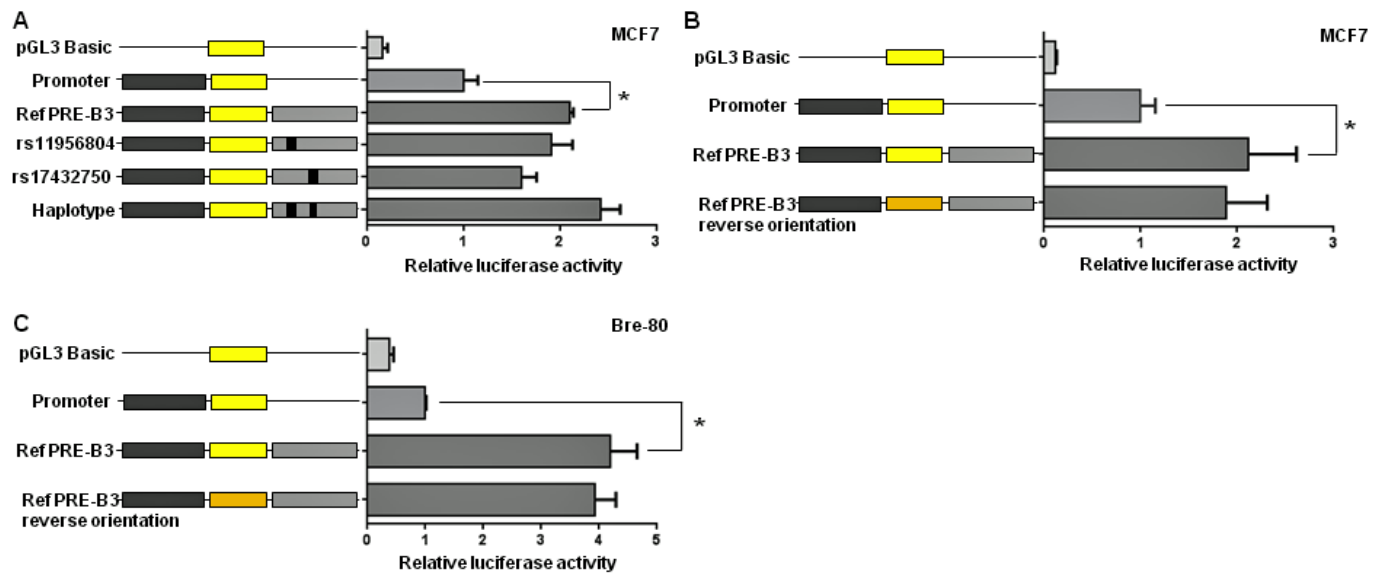

**Figure S8. Luciferase reporter assays of PRE-B3 constructs containing iCHAV3 SNPs in MCF7 and Bre-80 cells.** MCF7 cells were transiently transfected the PRE-B3 reference and variant luciferase constructs (A) or the PRE-B3 reference construct in the reverse orientation (B). Bre-80 cells were also transiently transfected with the reference PRE-B3 construct in the reverse orientation (C). Cells were assayed for luciferase activity after 24 h. Error bars denote SEM from three experiments performed with triplicates. *P*-values were determined by ANOVA followed by Dunnett's multiple comparisons test (\**P*<0.05).

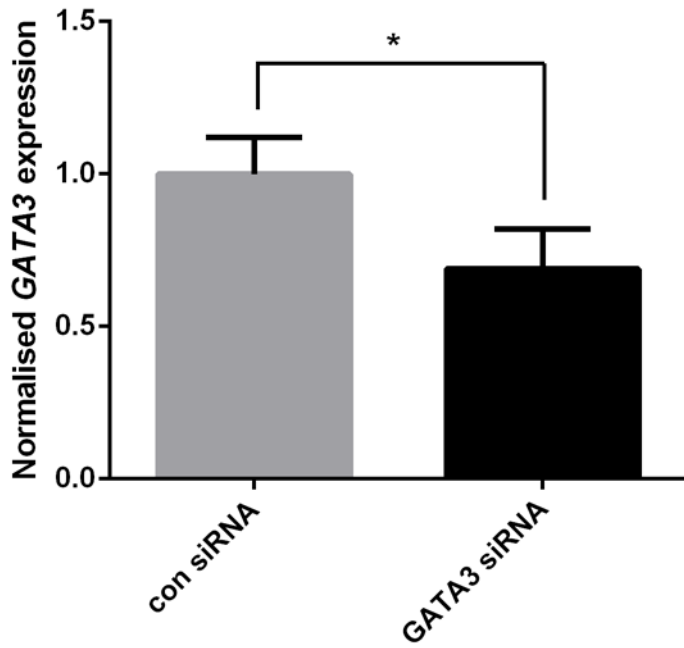

**Figure S9. TaqMan qPCR assay confirming knockdown of *GATA3* in Bre80 cells.** *GATA3* expression from cells transfected with non-targeting siRNA and *GATA3* is denoted by con siRNA and *GATA3* siRNA, respectively. Error bars denote SEM from three experiments performed with triplicates. Statistical significance was determined by a paired t-test ( $*P < 0.05$ ).

**Table S1. 3C qPCR primers**

| <b>3C primers</b>        | <b>EcoRI site<br/>(GRCh37 chr 5<br/>coordinates)</b> | <b>Sequence</b>                     |
|--------------------------|------------------------------------------------------|-------------------------------------|
| Fragment 1               | 55,988,536                                           | aacctttcctgttctgcttaaggtgggtg       |
| Fragment 2               | 56,001,687                                           | aagacagccaaagactctccaattccttctgc    |
| Fragment 3               | 56,002,653                                           | cactggctcagtcacctcattgattcagtc      |
| Fragment 4               | 56,015,010                                           | caaagaaacgagctctaagaggtgggcagc      |
| Fragment 5               | 56,015,005                                           | gaggcagattccctggaaccttctttcc        |
| Fragment 6               | 56,015,605                                           | cctgagtctcattccctcttctgcaagagacc    |
| Fragment 7               | 56,021,916                                           | aagagtctcgtctgtcagacaaaatgtcacgg    |
| Fragment 8               | 56,022,688                                           | aagaatcactgggtgttattgctggaaagg      |
| Fragment 9               | 56,023,585                                           | ctcatggcctatgtacctcaaaggctcc        |
| Fragment 10              | 56,024,547                                           | catgtaactgctgggttccattccagttcagg    |
| Fragment 11              | 56,026,749                                           | ggttctatgtgaaggtgccctccaaaacc       |
| Fragment 12              | 56,030,623                                           | aatccagcacctgctatgaacacctcatcc      |
| Fragment 13              | 56,037,547                                           | cctaagtcttctccagagcattttgaccttgc    |
| Fragment 14              | 56,040,674                                           | atcaggaggactacaatctaggggtatgctgagg  |
| Fragment 15              | 56,042,804                                           | gcaggactctttgtcagcatctttctctttcc    |
| Fragment 16              | 56,045,182                                           | tgggactgtgggagacacacagttttgc        |
| Fragment 17              | 56,046,719                                           | agcaatcagtaatgggaaaagatgccatgc      |
| Fragment 18              | 56,047,998                                           | ctcttctgcctgttctgacctgtgtcc         |
| Fragment 19              | 56,048,601                                           | tctaggtgtgtctgcaagggcatttctgg       |
| Fragment 20              | 56,056,381                                           | gccagtgtgtttgattccaaacctctgagc      |
| Fragment 21              | 56,056,646                                           | tggaacatgcttctactaaagccttctaggaagc  |
| Fragment 22              | 56,059,823                                           | gcagtgaatgaggtgacacagatctcc         |
| Fragment 23              | 56,061,410                                           | gcgtttgaactatccagagttaacacgcatcc    |
| Fragment 24              | 56,062,862                                           | aaggtgctgtcttatgaaagaggaaaccgagg    |
| Fragment 25              | 56,064,941                                           | ggaggaaagagtaggagacggctgttcagc      |
| Fragment 26              | 56,070,521                                           | agagtaagtaatgacctgcccacggcagg       |
| Fragment 27              | 56,078,074                                           | gacgaggtagggataattagtggaaccttaggc   |
| Fragment 28              | 56,090,803                                           | tcatagtgggtatggaatggtattgcattgtgc   |
| Fragment 29              | 56,093,049                                           | gtgaacacaagccgagatttcagaaggtagc     |
| Fragment 30              | 56,097,598                                           | ctatcctaccaatttgccagctaagtgattggg   |
| Fragment 31              | 56,103,646                                           | cagtttccctgatcccctattcccgc          |
| Fragment 32              | 56,107,073                                           | ttacaggaggatcttgggaaaatgtatgaacctc  |
| Fragment 33              | 56,108,495                                           | tctagccccagcactcctgcaagtattcc       |
| Fragment 34              | 56,109,036                                           | gcatgctgaaatcattgcaaggtttacg        |
| Bait (promoter fragment) | 56,112,866                                           | gcttaactgaaaaggggttctccctctgc       |
| Fragment 37              | 56,113,523                                           | gcactgtacctggcactactgagaccaaagg     |
| Fragment 38              | 56,115,580                                           | ttgtactccagtcattcttgggttgaggg       |
| Fragment 39              | 56,118,301                                           | cggccagaccattgcttgatgttaatagc       |
| Fragment 40              | 56,119,851                                           | aatgagagaaggcctaggaccaccttg         |
| Fragment 41              | 56,121,912                                           | cgtcatttcagcatcgtgctcagtttagtcc     |
| Fragment 42              | 56,123,317                                           | gatttacatcagagctgggacaagacagtctgg   |
| Fragment 43              | 56,127,536                                           | ttcaggttaatcagaccaactatcaggcaggc    |
| Fragment 44              | 56,128,078                                           | gaccgtccccattactgtcctaacactttgg     |
| Fragment 45              | 56,129,808                                           | aactaggatgattgaggctggatcccagacc     |
| Fragment 46              | 56,132,919                                           | cataagcagttcacataaaagacttatgggccagc |

---

|             |            |                                   |
|-------------|------------|-----------------------------------|
| Fragment 47 | 56,136,559 | gaagcaaccaagaggaagaaaggaactagc    |
| Fragment 48 | 56,142,493 | cttcacctcctgcttttctcctcacctgc     |
| Fragment 49 | 56,144,772 | gtaaattggagttattgtgcatgacatgtgg   |
| Fragment 50 | 56,159,585 | ggacatttgagctgctcctgtttggtgg      |
| Fragment 51 | 56,169,636 | gaagctgacaaaaacgctcctagggtgagg    |
| Fragment 52 | 56,170,833 | gatgggtcatgaaagggcaggtgagg        |
| Fragment 53 | 56,174,572 | tgtaggctcctgggtattcattttgttctgtgg |
| Fragment 54 | 56,175,998 | cctctgcaagtcataatgacttagttgcacagg |
| Fragment 55 | 56,178,759 | gtctcaggatgccctccccatagtcc        |
| Fragment 56 | 56,179,669 | ggctcaagatgtgggaactggaactttaatgg  |
| Fragment 57 | 56,181,895 | cggtggctcatttgctgagtaaatatggagc   |
| Fragment 58 | 56,183,388 | agattttggagctgcagccaggttg         |
| Fragment 59 | 56,188,350 | ccatacatcacagctcctccatactgttgacc  |
| Fragment 60 | 56,189,045 | tactaagaatcagaattgtccaacacggaagg  |
| Fragment 61 | 56,193,516 | gtctatgaaaaaattcatccactggatgggagg |
| Fragment 62 | 56,211,583 | tttctggattctgacatgaagactgtcacc    |

---

**Table S2. Reporter gene construct cloning and overlapping mutagenesis primers**

| Primer                  | Sequence                                           |
|-------------------------|----------------------------------------------------|
| MAP3K1 promoter forward | <u>acgcgtccac</u> ctctctgcagtaacatag               |
| MAP3K1 promoter reverse | <u>aagcttgcttc</u> ctctcggcaatctcg                 |
| rs74762363 forward      | ccagttcaaccactg <u>a</u> caaacagtcaaaaatcag        |
| rs74762363 reverse      | ctgattttgactgtttgt <u>t</u> cagtggttgaaactgg       |
| PRE-A forward           | <u>accggtgctca</u> actagccaaagcactcc               |
| PRE-A reverse           | <u>cctgcaggggg</u> caagtctaaagcagtgtgg             |
| rs7709971 forward       | cagttcagccactgtgg <u>a</u> aagcagtgagatctggag      |
| rs7709971 reverse       | ctccagatctcactgctt <u>t</u> ccacagtggctgaactg      |
| PRE-B3 forward          | <u>accggtgga</u> agatgggacaagccttgatgc             |
| PRE-B3 reverse          | <u>cctgcagggga</u> agaacaacctgtctcaatgatgg         |
| rs17432750 forward      | caacctggattctttcact <u>a</u> atcacacaagtcagg       |
| rs17432750 reverse      | cctgacttgtgtgatt <u>a</u> gtgaaagaatccaggttg       |
| rs11956804 forward      | gctgagcagttatctttgtcatatt <u>a</u> gtaggatgaatg    |
| rs11956804 reverse      | cattcatcctact <u>t</u> aaatatgacaaagataaactgctcagc |
| PRE2c forward           | <u>accggtaaa</u> agatagctttcaaagg                  |
| PRE2c reverse           | <u>gcgtcgacc</u> atagttacttcaaagg                  |
| rs12659430 forward      | <u>catgcatttg</u> atgtgtcctataaaaag                |
| rs12659430 reverse      | <u>ctttatagg</u> acacat <u>c</u> caaatgcatg        |
| rs62355881 forward      | <u>aaagtca</u> cgatgcttctggtagc                    |
| rs62355881 reverse      | <u>gctaccaga</u> agcatcc <u>g</u> tgacttt          |
| rs2113084 forward       | <u>taaattt</u> gtggcat <u>g</u> caaatattaaac       |
| rs2113084 forward       | <u>gtttta</u> atatttgc <u>a</u> tgccacaaatta       |
| PRE-C forward           | <u>accggtcca</u> agtttcatgcatggctctgtgg            |
| PRE-C reverse           | <u>cctgcaggg</u> tggcctttccagtacagtgg              |
| rs74345699 forward      | ggctcacgcctgtaat <u>t</u> cagcactttgg              |
| rs74345699 reverse      | ccaaagtgtg <u>a</u> gattacaggcgtgagcc              |
| rs62355900 forward      | tgggggagcatc <u>c</u> gaggtggatgaag                |
| rs62355900 reverse      | cttcatccacctc <u>g</u> gatgctcccca                 |
| rs62355901 forward      | ggagatcaagaccat <u>c</u> ccggctagcacg              |
| rs62355901 reverse      | cgtgctagccgg <u>g</u> atggtcttgatctcc              |
| rs62355902 forward      | tgggcaacagagcgagact <u>t</u> ccatctcaaaaaaca       |
| rs62355902 reverse      | tgtttttgagatgg <u>a</u> gtctcgctctgttgcca          |
| PRE-D forward           | <u>accggtggc</u> cattatagcagtgtctttgc              |
| PRE-D reverse           | <u>cctgcagggg</u> ctgatgcctagtagtcaattaagc         |
| rs77371588 forward      | ctgggcagtga <u>g</u> cccgtcttcagtg                 |
| rs77371588 reverse      | cactggaagacggg <u>c</u> tactgcccag                 |

Underlined sequences correspond to restriction enzyme recognition sites and bases highlighted in red denote SNP loci.

**Table S3. Primer pairs used in CHIP-RT-PCR and sequence confirmation**

| <b>Primer</b>         | <b>Sequence</b>              | <b>Ref or comment</b>                 |
|-----------------------|------------------------------|---------------------------------------|
| rs17432750-for1       | GGCCATCTGTTTTACCAACC         | RT-PCR                                |
| rs17432750-rev1       | ATTTGCACATGCCTTTCTCC         | RT-PCR                                |
| rs17432750-for2       | CAATGCAAATCTTCCTTGCTT        | RT-PCR & sequencing                   |
| rs17432750-rev2       | TGGGAAGGAGTCGTTGAGTT         | RT-PCR & sequencing                   |
| ER- $\alpha$ -ENH-for | TGTAGGCTAGTTTTGTTTAACGATTTTT | Cancer Research 2007;<br>67:6477-6483 |
| ER- $\alpha$ -ENH-rev | GGTGATGGGAGAATTGCTTAGAA      | as above                              |
| <i>CCND1</i> -for     | TGCCACACACCAGTGACTTT         | Genes Dev. 2006; 20:2513-<br>2526.    |
| <i>CCND1</i> -rev     | ACAGCCAGAAGCTCCAAAAA         | as above                              |

**Table S6. Associations of the iCHAV representative SNPs with breast cancer risk in Asian and African American studies**

| SNP                 | Position | Asian Studies |           |          |      |      |      | African American Studies |           |          |      |      |      |
|---------------------|----------|---------------|-----------|----------|------|------|------|--------------------------|-----------|----------|------|------|------|
|                     |          | MAF           | Imp $r^2$ | P-trend  | OR   | LCI  | UCI  | MAF                      | Imp $r^2$ | P-trend  | OR   | LCI  | UCI  |
| iCHAV1 rs62355902   | 56053723 | 0.38          | 0.94      | 3.30E-02 | 1.06 | 1.00 | 1.12 | 0.09                     | 0.98      | 2.30E-01 | 1.14 | 0.92 | 1.36 |
| iCHAV2a rs113317823 | 56087883 | 0.13          | 0.88      | 1.40E-05 | 1.19 | 1.11 | 1.27 | 0.06                     | 0.78      | 7.80E-01 | 1.04 | 0.77 | 1.31 |
| iCHAV2b rs62355899  | 56050465 | 0.26          | 1.00      | 7.46E-01 | 0.99 | 0.93 | 1.05 | 0.04                     | 1.00      | 9.60E-01 | 0.99 | 0.72 | 1.36 |
| iCHAV2c rs7721581   | 56087883 | 0.56          | 1.00      | 3.80E-01 | 0.98 | 0.93 | 1.03 | 0.06                     | 0.78      | 7.78E-01 | 1.04 | 0.78 | 1.38 |
| iCHAV3 rs11949391   | 56045081 | 0.05          | 1.00      | 2.60E-02 | 0.87 | 0.75 | 0.99 | 0.10                     | 1.00      | 1.20E-01 | 0.84 | 0.62 | 1.06 |
